# Supplementary material for: Differentiating the cognitive development of early-term births in infants and toddlers: a cross-sectional study in China
Source: PubMed Central journal article supplement — BMJ Open. 2019 Apr 11;9(4):e025275. doi: 10.1136/bmjopen-2018-025275 (PMC6500364; doi:10.1136/bmjopen-2018-025275), 2019-04-11
Supplement: bmjopen-2018-025275.draft_revisions.pdf [file bmjopen-2018-025275.draft_revisions.pdf]

# BMJ Open

BMJ Open is committed to open peer review. As part of this commitment we make the peer review history of every article we publish publicly available.

When an article is published we post the peer reviewers' comments and the authors' responses online. We also post the versions of the paper that were used during peer review. These are the versions that the peer review comments apply to.

The versions of the paper that follow are the versions that were submitted during the peer review process. They are not the versions of record or the final published versions. They should not be cited or distributed as the published version of this manuscript.

BMJ Open is an open access journal and the full, final, typeset and author-corrected version of record of the manuscript is available on our site with no access controls, subscription charges or pay-per-view fees (<http://bmjopen.bmj.com>).

If you have any questions on BMJ Open's open peer review process please email [info.bmjopen@bmj.com](mailto:info.bmjopen@bmj.com)

# BMJ Open

## Differentiating the cognitive development of early term births in Chinese infants and toddlers

|                               |                                                                                                                                                                                                                                                                                                                                                                                                                                                                                                                                                                                                                                                                                                                                                        |
|-------------------------------|--------------------------------------------------------------------------------------------------------------------------------------------------------------------------------------------------------------------------------------------------------------------------------------------------------------------------------------------------------------------------------------------------------------------------------------------------------------------------------------------------------------------------------------------------------------------------------------------------------------------------------------------------------------------------------------------------------------------------------------------------------|
| Journal:                      | <i>BMJ Open</i>                                                                                                                                                                                                                                                                                                                                                                                                                                                                                                                                                                                                                                                                                                                                        |
| Manuscript ID                 | bmjopen-2018-025275                                                                                                                                                                                                                                                                                                                                                                                                                                                                                                                                                                                                                                                                                                                                    |
| Article Type:                 | Research                                                                                                                                                                                                                                                                                                                                                                                                                                                                                                                                                                                                                                                                                                                                               |
| Date Submitted by the Author: | 09-Jul-2018                                                                                                                                                                                                                                                                                                                                                                                                                                                                                                                                                                                                                                                                                                                                            |
| Complete List of Authors:     | Hua, Jing; Shanghai First Maternity and Infant Hospital, Tongji University School of medicine,<br>Sun, Jie; Shanghai First Maternity and Infant Hospital, Tongji University School of medicine<br>Cao, Zhijuan; Shanghai First Maternity and Infant Hospital, Tongji University School of medicine<br>Dai, Xiaotian; Shanghai First Maternity and Infant Hospital, Tongji University School of medicine<br>Lin, Senran; Shanghai First Maternity and Infant Hospital, Tongji University School of medicine<br>Guo, Jialin; Shanghai First Maternity and Infant Hospital, Tongji University School of medicine<br>Gu, Guixiong; Pediatrics Research Institution of Soochow University<br>Du, Wenchong; Nottingham Trent University, Psychology Division |
| Keywords:                     | Cognitive development, early term, infants and toddlers, China                                                                                                                                                                                                                                                                                                                                                                                                                                                                                                                                                                                                                                                                                         |
|                               |                                                                                                                                                                                                                                                                                                                                                                                                                                                                                                                                                                                                                                                                                                                                                        |

SCHOLARONE™  
Manuscripts

Only

1  
2  
3  
4 **Differentiating the cognitive development of early term births in**  
5  
6 **Chinese infants and toddlers**  
7  
8  
9

10 Jing Hua<sup>1\*</sup>, Jie Sun<sup>1†</sup>, Zhijuan Cao<sup>1†</sup>, Xiaotian Dai<sup>1</sup>, Senran Lin<sup>1</sup>, Jialin Guo<sup>1†</sup>,  
11 Guixiong Gu<sup>2\*</sup>, Wenchong Du<sup>3</sup>  
12

13 \*Co-Corresponding author:  
14  
15

16 Jing Hua, Shanghai First Maternity and Infant Hospital, Tongji University School of Medicine  
17 P.O. 2699 Gaoke Road, 200042 Shanghai, China, Fax: 086-021-20261428, Email:  
18 szhuaj@hotmail.com, Jing Hua. Guixiong Gu, Pediatrics Research Institution of Soochow  
19 University; P.O. 303 Jingde Road, 215003 Suzhou, China E-mail Phone: 086-0512-80696526  
20 Email: szggx000@163.com.  
21  
22  
23  
24  
25

26 <sup>1</sup>Shanghai First Maternity and Infant Hospital, Tongji University School of Medicine,  
27 Shanghai, China;  
28

29 <sup>2</sup>Pediatrics Research Institution of Soochow University, Suzhou, China;  
30

31 <sup>3</sup>Psychology Division, Nottingham Trent University, Chaucer Building 4013,  
32 Nottingham, UK  
33  
34  
35

36  
37 <sup>†</sup>These authors contributed equally to this work.  
38  
39  
40  
41  
42  
43  
44  
45  
46  
47  
48  
49  
50  
51  
52  
53  
54  
55  
56  
57  
58  
59  
60

## ABSTRACT

**Objectives:** This study aimed to explore the cognitive development of low-risk children during early childhood for preterm births at 37 and 38 weeks of gestation compared to full term births at 39-41 weeks of gestation.

**Setting and Participants:** We conducted a cross-sectional study in Shanghai, one of the largest cities in China. A total of 1444 children from singleton pregnancies born at term gestation were included in the study.

**Measures:** The cognitive outcomes of the subjects were measured using the cognitive subtest of Bayley Scales of Infant and toddler Development-third Edition (BSID-III) across three cities in China. We analyzed the association between gestational age and cognitive development during infancy and toddler stages using multivariate linear modeling.

**Results:** The cognitive development scores for infants born at 37 gestational weeks were significantly lower than those born at 39 to 41 gestational weeks ( $\beta=-2.257$ , 95%CI:-4.280 to -0.235;  $p<0.05$ ) after adjusting for children's and maternal characteristics, as well as socio-economic factors. However, there were no significant differences in cognitive ability between infants born at 38 gestational weeks compared to their full-term counterparts ( $p>0.05$ ). Moreover, these effects were not found in toddlers (between 17 and 48 months of age) after adjusting for the possible confounders ( $p>0.05$ ).

**Conclusions:** Infants born at 37 weeks of gestation exhibited weaker cognitive ability compared with those born at 39-41 weeks of gestation. Our findings provide clues for the close monitoring of potential developmental problems in early term children, especially those born at 37 gestational weeks.

**Keywords:** Cognitive development; early term, infants and toddlers; China

### Strengths and limitations of this study

- Our findings extend the limited available literature on the relationship of gestational age with cognitive developmental scores. Infants born at 37 weeks of gestation had significantly weaker cognitive ability compared with their full-term counterparts.
- Our finding provided clues for the close monitoring of potential developmental problems in early term children, especially in those born at 37 gestational weeks.
- The sample size was relatively small in our study (n=1444), and the results were not consistent across different age groups. Further studies are needed in order to verify this result.
- Although we examined a number of potential confounders, several other confounding factors were not measured. For instance, the detailed maternal and obstetric factors for early-term deliveries were not available in our study.

## INTRODUCTION

It had been previously believed that children born between 37 and 41 weeks of gestational age share similar health outcomes, therefore including them in the same low-risk group.<sup>1</sup> In 2012, the American Academy of Pediatrics recommended that births occurring between 37 weeks 0 days and 38 weeks 6 days be defined as early term, while those from 39 weeks 0 days through to 40 weeks 6 days as full term.<sup>2</sup> Approximately 27.6% of all births in the United States are early term,<sup>3,4</sup> far exceeding the number of preterm births.<sup>4,5</sup> Many studies have reported that early-term births are associated with higher neonatal morbidity and higher probability of NICU admission compared with their full term counterparts (> 38 gestational weeks).<sup>6</sup> Early term children also have increased susceptibility to various metabolic, neurologic and respiratory diseases.<sup>7-9</sup>

Recently, research into the effect of gestational age on developmental outcomes has directed attention to the investigation of early term infants.<sup>10</sup> There have been increasing reports which show that early term births resulted in worsened cognitive and academic outcomes compared to those born at 39 weeks or later.<sup>1,10-13</sup> A systematic review showed that full-term cohorts performed 3% of a standard deviation higher in cognitive outcome than early term cohorts<sup>10</sup>. The gestation period between 37-40 weeks was associated with neuromotor and cognitive development in 9- to 15-week-old and 12-month-old infants.<sup>13,14</sup> Early term birth was associated with an increased risk of worsened academic achievements at ages 5 to 7 years.<sup>15,16</sup>

1  
2  
3  
4  
5  
6  
7  
8  
9  
10  
11  
12  
13  
14  
15  
16  
17  
18  
19  
20  
21  
22  
23  
24  
25  
26  
27  
28  
29  
30  
31  
32  
33  
34  
35  
36  
37  
38  
39  
40  
41  
42  
43  
44  
45  
46  
47  
48  
49  
50  
51  
52  
53  
54  
55  
56  
57  
58  
59  
60

However, on the basis of recent research,<sup>13,17-19</sup> the exact boundary which separates early term and full term gestation periods should be carefully examined because of its implications for neonatal and developmental outcomes. The highest risk of mortality was observed for children born at 37 gestational weeks, but not for those born at 38 gestational weeks.<sup>19</sup> Furthermore, a prospective cohort study in Belarus showed that children born at 37 gestational weeks had a significantly lower full-scale intelligence quotient (IQ) score compared with those born at 39-41 weeks, however, this difference was not observed in children born at 38 gestational weeks.<sup>20</sup> Moreover, in a large sample of healthy infants, there was a significant difference in the mental development index (MDI) between infants born at 37 and 38 gestational weeks, but almost no difference between those born at 38 and 39 gestational weeks.<sup>13</sup> However, the degree to which earlier gestational age confers risk among infants born at term from 37 to 41 weeks of gestation remains unclear.<sup>12,20,21</sup>

In this study, we used a cross-sectional study design to examine a sample of urban Chinese singleton pregnancies born at term gestation. We hypothesized that early term births may result in significant cognitive delay, especially those born at 37 gestational weeks. We further examined the differences in cognitive ability in both infants and toddlers across various term births in order to determine the true underlying risk across different gestational weeks. The aim of the study is: 1) to differentiate the cognitive development of children born at 37, 38 and 39-41 gestational weeks; 2) to independently analyze the effects of gestational weeks on cognitive development in both short-term (infants) and long term (toddlers), in order

1  
2  
3 to provide clues for the close monitoring of potential developmental problems in early  
4  
5  
6 term children.  
7  
8  
9

## 10 **MATERIALS AND METHODS**

### 13 **Participants**

14  
15 We conducted a cross-sectional study in mainland China from May to December of  
16  
17 2011. We used a stratified sampling technique, with area, gender, and months of age  
18  
19 as stratification variables. A total of 1589 children aged between 16 days to 42 months  
20  
21 were selected from 3 children's healthcare institutions in medium-sized cities  
22  
23 distributed across 3 geographic regions: North China, Middle China, and East China.  
24  
25 The selection of age bands was based on the categories proposed in the Bayley-III  
26  
27 technical manual (totaling 48 age bands). The inclusion criteria for infants and  
28  
29 toddlers included: singleton and born at term, born without significant medical  
30  
31 complications, did not have a history of medical complications, and not currently  
32  
33 diagnosed with or receiving treatment for mental, physical or behavioral difficulties.  
34  
35 The exclusion criteria included: confounding conditions or developmental risk factors  
36  
37 such as abnormal hearing or vision, taking medications that could affect performance  
38  
39 or admission to hospital at the time of testing, and any other problems involving  
40  
41 nutrition, sleep or infections during the clinical visit. Of the 1589 eligible children  
42  
43 who were recruited, a total of 1444 children were included for the study (Figure 1).  
44  
45  
46  
47  
48  
49  
50  
51  
52 All information was kept confidential and was only accessible to the researchers.  
53  
54  
55  
56  
57  
58  
59  
60



## **Patient and Public Involvement**

None of the patients were involved in the research design or development of the research question and outcome measures. They were also not involved in the recruitment and conduct of the study. The results of the study would be disseminated to study participants by means of the participating children's healthcare institutions.

## **Measurements**

The Bayley Scale of Infant and Toddler Development, Third Edition (Bayley-III) is an individually administered scale that assesses five key developmental domains in children between 1-42 months of age: cognition, language (receptive and expressive communication), motor (gross and fine), social-emotional and adaptive behavior. The first three domains are assessed through direct observation of the child in test situations, while the last two are assessed through questionnaires to be completed by the main caregiver. We first obtained formal permission to translate and validate the Bayley-III scale from the American publishers of this tool (Pearson). We then started developing a Chinese version of Bayley-III, following the recommendations of Hambleton and Patsula (1999), and Herdman, Fox-Rushby and Badia (1998) for the translation and adaptation of a test, taking into consideration conceptual, item, semantic, operational, measurement and functional equivalences. Each step of this process was presented in the results section. The Chinese version of the BSID-III was translated by a native Chinese speaker and independent professional who adapted the

1  
2  
3 items into context and culture. Subsequently, the final Chinese version of the BSID-III  
4  
5 was retranslated into English by two native English speakers who were blinded to the  
6  
7 original version. The test manual and materials will utilize the same trademark, logo,  
8  
9 and design as used on the English version of the test. We have explored the reliability  
10  
11 and validity of the Bayley-III cognitive scale in a parallel study, which showed a good  
12  
13 to excellent reliability of the Bayley-III cognitive scale (e.g. the coefficients of  
14  
15 inter-item consistency were more than 0.75; the test-retest and inter-rater reliability of  
16  
17 the scale were more than 0.90). The content, construct and known-group validity of  
18  
19 Bayley-III cognitive scale were also sufficient in the parallel study. Additionally,  
20  
21 gestational age is measured as the age of a pregnancy which was taken from the  
22  
23 woman's last menstrual period, records of which were obtained from the hospital's  
24  
25 medical record registration system following confirmation by ultrasound exam.  
26  
27  
28  
29  
30  
31  
32  
33  
34  
35

### 36 **Procedure**

37  
38 The survey was conducted during the well-child visits in the participating children's  
39  
40 healthcare institutions. Nurses who took part in the check in and physical examination  
41  
42 (weight, height and head circumference) were responsible for handing out the  
43  
44 questionnaires to the children's parents. Six developmental pediatricians were trained  
45  
46 to administrate the Bayley-III cognitive scale. The testers had become familiar with  
47  
48 the test guidance by carrying out a series of practice assessments on several children  
49  
50 who did not take part in the study. Any problems associated with test administration  
51  
52 during the training period were clarified by the administrator of this study prior to the  
53  
54  
55  
56  
57  
58  
59  
60

1  
2  
3 test. The test environment was quiet and non-interfering, and all infants and toddlers  
4  
5  
6 needed to be sober, stable and satiated. The tester encouraged the infants and toddlers  
7  
8  
9 to display their highest level of ability during the test. A trained pediatrician took the  
10  
11 responsibility for conducting the entire test for each child in order to maximize both  
12  
13 interpretation validity and assessment reliability.  
14  
15

### 16 17 18 **Statistical analysis**

19  
20 All analyses were performed using SPSS 17.0 software. Chi-square analyses were  
21  
22 used for comparing children and maternal characteristics between those born at 37 or  
23  
24 38 gestational weeks and those born at full term (39-41 gestational weeks). Means of  
25  
26 cognitive scores among different gestational weeks was evaluated using one-way  
27  
28 ANOVA and post-hoc comparison. Multivariate linear regression was used to test the  
29  
30 relationship between gestational age and cognitive developmental scores, taking into  
31  
32 account potential confounding variables including gender, weight-for-length Z-scores,  
33  
34 parity, mother's age, delivery mode, parents' education and occupation. Social  
35  
36 economic factors were not included because they were highly correlated with parental  
37  
38 occupation.  $p < 0.05$  was considered statistically significant.  
39  
40  
41  
42  
43  
44  
45  
46  
47

### 48 **RESULTS**

49  
50 Of the 1444 children included in the study, 844 were infants aged between 16 days  
51  
52 after birth to 16 months (58.4%), and 600 were toddlers aged between 17 months to  
53  
54 48 months (41.6%). Among these subjects, 1152 (79.8%) were full term births, 87  
55  
56  
57  
58  
59  
60

1  
2  
3 (6.02%) were born at 37 gestational weeks, and 205 (14.2%) were born at 38  
4 gestational weeks. The mean cognitive composite score was 101.9, with a standard  
5 deviation of 6.9. The parity, the family's city of residence, and parents' education  
6 were significantly different among those born at 37, 38 and 39-41 gestational ages  
7 (Table 1).  
8  
9  
10  
11  
12  
13  
14

15 The cognitive composite score was expressed as means and 95% confidence  
16 interval (Figure 2). In infants aged between 16 days to 16 months, the cognitive  
17 composite score for those born at 37 gestational weeks of age was significantly lower  
18 than those born at 39-41 gestation weeks ( $p < 0.05$ ).  
19  
20  
21  
22  
23  
24

25 Using multivariate linear regression model, cognitive composite scores for children  
26 born at 37 weeks were significantly lower than those born at 39-41 gestational weeks  
27 during infancy, when not adjusting for ( $\beta = -2.810$ , 95%CI: -4.847 to -0.774;  $p = 0.007$ )  
28 or adjusting for the children's characteristics only ( $\beta = -2.723$ , 95%CI: -4.765 to -0.680;  
29  $p = 0.009$ ), or in combination with maternal characteristics ( $\beta = -2.545$ , 95%CI: -4.590 to  
30 -0.500;  $p = 0.015$ ), as well as socio-economic factors ( $\beta = -2.257$ , 95%CI: -4.280 to  
31 -0.235;  $p = 0.029$ ; Table 2).  
32  
33  
34  
35  
36  
37  
38  
39  
40  
41  
42

43 However, in toddlers aged between 17 months to 48 months (Table 2), there were  
44 almost no statistically significant associations between those born at 37 or 38  
45 gestational weeks to those born in full term (39-41 gestational weeks). The only  
46 difference was a lower composite cognitive score in toddlers born at 38 gestational  
47 weeks compared to those born in full term ( $p = 0.041$ ), when not adjusting for any  
48 other variables.  
49  
50  
51  
52  
53  
54  
55  
56  
57  
58  
59  
60

## DISCUSSION

To our knowledge, our paper is the first in China and one of few studies in the world to report on the short- and long-term neurobehavioral outcomes of early term children. A weaker cognitive ability was observed in infants born at 37 gestational weeks compared with their full-term (born at 39-41 gestational weeks) counterparts. Our findings extend the limited available literature on the relationship of gestational age to cognitive developmental scores.

In our study, we found that the effect of early term birth (37 gestational weeks) persisted in infancy even when a broad range of confounders including parental characteristics were considered. The mechanisms underlying the effect of early term birth on cognitive development scores may be multifactorial. The intrauterine and extrauterine environments differ dramatically in relationship to maternal and placental hormones, which may play an important role in brain development.<sup>13</sup> The intrauterine environment supports typical brain development, which is more likely to be disrupted in children born during early term gestation.<sup>12</sup> Moreover, brain development occurs in a very specific order and time frame.<sup>10</sup> The volume of total grey matter increases by approximately 1.4% per week from 29 to 41 weeks of gestation, while the volume of white matter sees a fivefold increase between 35 and 41 weeks of gestation.<sup>22,23</sup> Early term births may cause disruptions at specific times during the development of the brain's neural connections for specific cognitive areas.<sup>24</sup> Even at 38 weeks of gestation, the brain is still only 90% of full-term weight.<sup>25</sup> However, there have been

1  
2  
3 no studies about the subtle differences in brain development between infants born at  
4  
5  
6 37 and 38 gestational weeks. Future research is necessary to investigate the  
7  
8 mechanisms behind this phenomenon.  
9

10  
11 Additionally, children who were born early term may have a shorter breastfeeding  
12  
13 duration compared with children born at full term.<sup>23,26-28</sup> The breastfeeding duration  
14  
15 was positively associated with children's cognitive development,<sup>29,30</sup> possibly due to  
16  
17 the abundance of cognition-related nutrients found in breast milk such as  
18  
19 docosahexaenoic (DHA) and arachidonic acid. Shorter breastfeeding duration may  
20  
21 result in an increase in morbidity such as asthma and the number of hospital  
22  
23 admissions, which was associated with a delay in achieving early developmental  
24  
25 milestones that may have an effect educational achievements.<sup>23</sup>  
26  
27  
28  
29

30  
31 This finding further supports the results from previous related research. For  
32  
33 example, the highest mortality rate was observed among children born at 37 weeks of  
34  
35 gestation, which necessitates caution in inducing labor for early term pregnancies (37  
36  
37 weeks of gestation). When gestational age in days was classified as gestational weeks,  
38  
39 the mortality for children born at 37 weeks of gestation was higher compared to  
40  
41 later-term births,<sup>17,31-33</sup> however, children born at 38 weeks of gestation was not  
42  
43 associated with an increased mortality. Thus, the true underlying problems for  
44  
45 children born in week 37, remains unknown. Our findings, combined with these  
46  
47 studies, also provide the clues for the categorization of early term births. Close  
48  
49 monitoring for any signs of developmental problems is of the utmost importance in  
50  
51 children born at 37 gestational weeks.  
52  
53  
54  
55  
56  
57  
58  
59  
60

1  
2  
3  
4 Interestingly, in our study, the problems associated with early term birth was not  
5  
6 found in toddlers (aged between 17 months to 48 months), possibly due to the fact  
7  
8 that the family parenting environment had a greater impact on long-term outcomes,  
9  
10 which ‘weakened’ the association between early term birth and cognitive  
11  
12 development. A previous study showed that the quality of stimulation in the family  
13  
14 environment is crucial for the child's cognitive development.<sup>34</sup> A randomized control  
15  
16 trial suggested that intervention on family environment and maternal competency has  
17  
18 positive effects on child development (including cognitive and motor development).<sup>35</sup>  
19  
20 In China, the effects of home and educational environments can promote the motor  
21  
22 performance in preschoolers.<sup>36</sup>  
23  
24  
25  
26  
27  
28  
29

### 30 CONCLUSIONS

31  
32 Our study showed that the cognitive development scores for children born at 37  
33  
34 gestational weeks were significantly lower than those born at 39 to 41 gestation weeks.  
35  
36 Therefore, healthcare professionals need to be more aware of the potential short-term  
37  
38 and long-term care requirements of early term children. Close monitoring for any  
39  
40 signs of health and developmental problems in early term children born at 37  
41  
42 gestational weeks can allow the early detection and timely treatment of borderline  
43  
44 abnormalities, as well as prevent any potential negative health outcomes. However,  
45  
46 because the sample size of our study was relatively small, and the results were not  
47  
48 consistent across different age groups, further studies are needed in order to verify  
49  
50 these results. Moreover, although we examined a number of potential confounders,  
51  
52  
53  
54  
55  
56  
57  
58  
59  
60

1  
2  
3 several other confounding factors were not measured. For instance, the detailed  
4  
5 maternal and obstetric factors for early-term deliveries were not available in our study.  
6  
7 Further, the cognitive developmental scores of children in our study are all normal  
8  
9 (above 80 points), possibly because we selected singletons born at term birth who  
10  
11 were mostly at low-risk.  
12  
13  
14  
15

16  
17  
18 **Acknowledgements** The authors wish to thank all researchers and medical practitioners  
19  
20 who participated in this study for the distribution and collection of the questionnaires,  
21  
22 as well as administrating the cognitive scale testing for children. We also thank Bing  
23  
24 Wang for acquiring the Research Translation License Agreement of the Bayley-3  
25  
26 cognitive scale.  
27  
28  
29  
30  
31

32  
33 **Contributors** JH, JS, ZC and JG contributed to the study design and drafting of the  
34  
35 paper. XD and SL were responsible for literature search, quality control of the testing,  
36  
37 and data collection. WD and GG revised the paper and approved the finalized  
38  
39 manuscript submission.  
40  
41  
42  
43

44  
45 **Funding** National Natural Science Foundation of China under Grant (81673179,  
46  
47 81402687), the Shengkang Hospital Development Center under  
48  
49 Grant(SHDC12016239), the Science and Technology Commission of Shanghai  
50  
51 Municipality under Grant (18140903100)  
52  
53  
54  
55  
56  
57  
58  
59  
60



1  
2  
3 **Competing interests** None declared.  
4  
5

6  
7 **Ethics approval** The study received ethical approval from the Local Committee of  
8  
9  
10  
11  
12  
13  
14  
15  
16  
17  
18  
19  
20  
21  
22  
23  
24  
25  
26  
27  
28  
29  
30  
31  
32  
33  
34  
35  
36  
37  
38  
39  
40  
41  
42  
43  
44  
45  
46  
47  
48  
49  
50  
51  
52  
53  
54  
55  
56  
57  
58  
59  
60  
**Ethics approval** The study received ethical approval from the Local Committee of  
Soochow University, China (201101). Written informed consent was obtained from the  
parents or legal guardians of the participants prior to the questionnaire survey. Oral  
parental consents were obtained prior to investigation and tests.

**Provenance and peer review** Not commissioned; externally peer reviewed.

**Data sharing statement** Data sets generated and/or analysed during the current study  
available from the corresponding author on reasonable request.

**Open Access** This is an Open Access article distributed in accordance with the Creative  
Commons Attribution Non Commercial (CC BY-NC 4.0) license, which permits others to  
distribute, remix, adapt, build upon this work non-commercially, and license their derivative  
works on different terms, provided the original work is properly cited and the use is  
non-commercial. See: <http://creativecommons.org/licenses/by-nc/4.0/>

**Conflict of interest statement**

None declared.

## References

- 1 Sengupta S, Carrion V, Shelton J, Wynn RJ, Ryan RM, Singhal K, et al. Adverse Neonatal Outcomes Associated With Early-Term Birth. *JAMA Pediatrics* 2013;**167**(11):1053 doi: 10.1001/jamapediatrics.2013.2581 published Online First.
- 2 Spong CY. Defining “Term” Pregnancy. *Jama* 2013;**309**(23):2445 doi: 10.1001/jama.2013.6235 published Online First.
- 3 Martin JA, Hamilton BE, Sutton PD, Ventura SJ, Mathews TJ, Kirmeyer S, et al. Births: final data for 2007. *Natl Vital Stat Rep* 2010;**58**(24):1-85 Online First: 2011/01/25].
- 4 Martin JA, Hamilton BE, Ventura SJ, Osterman MJ, Kirmeyer S, Mathews TJ, et al. Births: final data for 2009. *Natl Vital Stat Rep* 2011;**60**(1):1-70 Online First: 2012/06/08].
- 5 Mally PV, Agathis NT, Bailey SM. Early term infants are at increased risk of requiring neonatal intensive care. *World journal of pediatrics : WJP* 2016;**12**(1):76-81 doi: 10.1007/s12519-015-0049-8 published Online First.
- 6 Craighead DV. Early term birth: understanding the health risks to infants. *Nursing for women's health* 2012;**16**(2):136-144; quiz 145 doi: 10.1111/j.1751-486X.2012.01719.x published Online First.
- 7 Schonhaut L, Armijo I, Perez M. Gestational age and developmental risk in moderately and late preterm and early term infants. *Pediatrics* 2015;**135**(4):e835-841 doi: 10.1542/peds.2014-1957 published Online First.
- 8 Rabie NZ, Bird TM, Magann EF, Hall RW, McKelvey SS. ADHD and developmental speech/language disorders in late preterm, early term and term infants. *Journal of perinatology : official journal of the California Perinatal Association* 2015;**35**(8):660-664 doi: 10.1038/jp.2015.28 published Online First.
- 9 Goyal NK, Attanasio LB, Kozhimannil KB. Hospital care and early breastfeeding outcomes among late preterm, early-term, and term infants. *Birth* 2014;**41**(4):330-338 doi: 10.1111/birt.12135 published Online First.
- 10 Chan E, Leong P, Malouf R, Quigley MA. Long-term cognitive and school outcomes of late-preterm and early-term births: a systematic review. *Child: Care, Health and Development* 2016;**42**(3):297-312 doi: 10.1111/cch.12320 published Online First.
- 11 Richards JL, Drews-Botsch C, Sales JM, Flanders WD, Kramer MR. Describing the Shape of the Relationship Between Gestational Age at Birth and Cognitive Development in a Nationally Representative U.S. Birth Cohort. *Paediatric and Perinatal Epidemiology* 2016;**30**(6):571-582 doi: 10.1111/ppe.12319 published Online First.
- 12 Noble KG, Fifer WP, Rauh VA, Nomura Y, Andrews HF. Academic Achievement Varies With Gestational Age Among Children Born at Term. *Pediatrics*

- 2012;**130**(2):e257-e264 doi: 10.1542/peds.2011-2157published Online First.
- 13 Rose O, Blanco E, Martinez SM, Sim EK, Castillo M, Lozoff B, et al. Developmental scores at 1 year with increasing gestational age, 37-41 weeks. *Pediatrics* 2013;**131**(5):e1475-1481 doi: 10.1542/peds.2012-3215published Online First.
- 14 van Batenburg-Eddes T, de Groot L, Arends L, de Vries A, Moll HA, Steegers EA, et al. Does gestational duration within the normal range predict infant neuromotor development? *Early human development* 2008;**84**(10):659-665 doi: 10.1016/j.earlhumdev.2008.04.007published Online First.
- 15 Quigley MA, Poulsen G, Boyle E, Wolke D, Field D, Alfirovic Z, et al. Early term and late preterm birth are associated with poorer school performance at age 5 years: a cohort study. *Arch Dis Child Fetal Neonatal Ed* 2012;**97**(3):F167-173 doi: 10.1136/archdischild-2011-300888published Online First.
- 16 Chan E, Quigley MA. School performance at age 7 years in late preterm and early term birth: a cohort study. *Arch Dis Child Fetal Neonatal Ed* 2014;**99**(6):F451-F457 doi: 10.1136/archdischild-2014-306124published Online First.
- 17 Reddy UM, Bettegowda VR, Dias T, Yamada-Kushnir T, Ko CW, Willinger M. Term pregnancy: a period of heterogeneous risk for infant mortality. *Obstetrics and gynecology* 2011;**117**(6):1279-1287 doi: 10.1097/AOG.0b013e3182179e28published Online First.
- 18 Engle WA. Morbidity and mortality in late preterm and early term newborns: a continuum. *Clinics in perinatology* 2011;**38**(3):493-516 doi: 10.1016/j.clp.2011.06.009published Online First.
- 19 Wu CS, Sun Y, Nohr EA, Olsen J. Trends in All-Cause Mortality across Gestational Age in Days for Children Born at Term. *PloS one* 2015;**10**(12):e0144754 doi: 10.1371/journal.pone.0144754published Online First.
- 20 Yang S, Platt RW, Kramer MS. Variation in child cognitive ability by week of gestation among healthy term births. *American journal of epidemiology* 2010;**171**(4):399-406 doi: 10.1093/aje/kwp413published Online First.
- 21 Schonhaut L, Armijo I, Perez M. Gestational Age and Developmental Risk in Moderately and Late Preterm and Early Term Infants. *Pediatrics* 2015;**135**(4):e835-e841 doi: 10.1542/peds.2014-1957published Online First.
- 22 Kinney HC. The near-term (late preterm) human brain and risk for periventricular leukomalacia: a review. *Seminars in perinatology* 2006;**30**(2):81-88 doi: 10.1053/j.semperi.2006.02.006published Online First.
- 23 Quigley MA, Poulsen G, Boyle E, Wolke D, Field D, Alfirovic Z, et al. Early term and late preterm birth are associated with poorer school performance at

- age 5 years: a cohort study. *Archives of Disease in Childhood - Fetal and Neonatal Edition* 2012;**97**(3):F167-F173 doi: 10.1136/archdischild-2011-300888published Online First.
- 24 Hensch TK. Critical period plasticity in local cortical circuits. *Nat Rev Neurosci* 2005;**6**(11):877-888 doi: 10.1038/nrn1787published Online First: 2005/11/02].
- 25 Kapellou O, Counsell SJ, Kennea N, Dyet L, Saeed N, Stark J, et al. Abnormal cortical development after premature birth shown by altered allometric scaling of brain growth. *PLoS Med* 2006;**3**(8):e265 doi: 10.1371/journal.pmed.0030265published Online First: 2006/07/27].
- 26 Ip S, Chung M, Raman G, Chew P, Magula N, DeVine D, et al. Breastfeeding and maternal and infant health outcomes in developed countries. *Evid Rep Technol Assess (Full Rep)* 2007(153):1-186 Online First: 2007/09/04].
- 27 Quigley MA, Hockley C, Carson C, Kelly Y, Renfrew MJ, Sacker A. Breastfeeding is associated with improved child cognitive development: a population-based cohort study. *The Journal of pediatrics* 2012;**160**(1):25-32 doi: 10.1016/j.jpeds.2011.06.035published Online First.
- 28 Boucher O, Julvez J, Guxens M, Arranz E, Ibarluzea J, Sanchez de Miguel M, et al. Association between breastfeeding duration and cognitive development, autistic traits and ADHD symptoms: a multicenter study in Spain. *Pediatric research* 2017;**81**(3):434-442 doi: 10.1038/pr.2016.238published Online First.
- 29 Girard LC, Doyle O, Tremblay RE. Breastfeeding, Cognitive and Noncognitive Development in Early Childhood: A Population Study. *Pediatrics* 2017;**139**(4) doi: 10.1542/peds.2016-1848published Online First.
- 30 Koh K. Maternal breastfeeding and children's cognitive development. *Social science & medicine* 2017;**187**:101-108 doi: 10.1016/j.socscimed.2017.06.012published Online First.
- 31 Räisänen SH, Wu CS, Sun Y, Nohr EA, Olsen J. Trends in All-Cause Mortality across Gestational Age in Days for Children Born at Term. *PloS one* 2015;**10**(12):e0144754 doi: 10.1371/journal.pone.0144754published Online First.
- 32 Crump C, Sundquist K, Winkleby MA, Sundquist J. Early-term birth (37-38 weeks) and mortality in young adulthood. *Epidemiology* 2013;**24**(2):270-276 doi: 10.1097/EDE.0b013e318280da0fpublished Online First: 2013/01/23].
- 33 Zhang X, Kramer MS. Variations in mortality and morbidity by gestational age among infants born at term. *J Pediatr* 2009;**154**(3):358-362, 362.e351 doi: 10.1016/j.jpeds.2008.09.013published Online First: 2008/10/28].
- 34 Andrade SA, Santos DN, Bastos AC, Pedromonico MR, de Almeida-Filho N, Barreto ML. [Family environment and child's cognitive development: an epidemiological approach]. *Revista de saude publica* 2005;**39**(4):606-611 doi: /S0034-89102005000400014published Online First.

- 1  
2  
3 35 Sierau S, Dahne V, Brand T, Kurtz V, von Klitzing K, Jungmann T. Effects of  
4 Home Visitation on Maternal Competencies, Family Environment, and  
5 Child Development: a Randomized Controlled Trial. *Prevention science :*  
6 *the official journal of the Society for Prevention Research* 2016;**17**(1):40-51  
7 doi: 10.1007/s11121-015-0573-8published Online First.  
8  
9 36 Hua J, Duan T, Gu G, Wo D, Zhu Q, Liu JQ, et al. Effects of home and education  
10 environments on children's motor performance in China. *Developmental*  
11 *medicine and child neurology* 2016;**58**(8):868-876 doi:  
12 10.1111/dmcn.13073published Online First.  
13  
14  
15  
16  
17  
18  
19  
20  
21  
22  
23  
24  
25  
26  
27  
28  
29  
30  
31  
32  
33  
34  
35  
36  
37  
38  
39  
40  
41  
42  
43  
44  
45  
46  
47  
48  
49  
50  
51  
52  
53  
54  
55  
56  
57  
58  
59  
60

**Table 1**  
Characteristics by Gestational age (n=1444)

|                                              | Total      | Early term children        |                            | Full term children             | P         |
|----------------------------------------------|------------|----------------------------|----------------------------|--------------------------------|-----------|
|                                              |            | 37wk <sup>a</sup><br>n (%) | 38wk <sup>a</sup><br>n (%) | 39-41 wk <sup>a</sup><br>n (%) |           |
| <b>Children's characteristic<sup>b</sup></b> |            |                            |                            |                                |           |
| Weight for length Z-score                    |            |                            |                            |                                |           |
| Normal                                       | 1156(80.1) | 72(82.8)                   | 162(79.0)                  | 922(80.0)                      | 0.765     |
| Over-weighted                                | 288(19.9)  | 15(17.2)                   | 43(21.0)                   | 230(20.0)                      |           |
| Gender                                       |            |                            |                            |                                |           |
| Male                                         | 722(50.0)  | 51(58.6)                   | 110(53.7)                  | 561(48.7)                      | 0.107     |
| Female                                       | 722(50.0)  | 36(41.4)                   | 95(46.3)                   | 591(51.3)                      |           |
| <b>Maternal characteristic</b>               |            |                            |                            |                                |           |
| Parity, n(%) <sup>b</sup>                    |            |                            |                            |                                |           |
| Nulliparous                                  | 1255(8.9)  | 65(74.7)                   | 181(88.3)                  | 1009(87.6)                     | 0.002**   |
| Multiparous                                  | 189(13.1)  | 22(25.3)                   | 24(11.7)                   | 143(12.4)                      |           |
| Maternal age at delivery                     |            |                            |                            |                                |           |
| ≥35                                          | 49(3.4)    | 3(3.4)                     | 6(2.9)                     | 40(3.5)                        | 0.924     |
| <35                                          | 1395(9.6)  | 84(96.6)                   | 199(97.1)                  | 1112(96.5)                     |           |
| Delivery mode, n(%)                          |            |                            |                            |                                |           |
| Caesarean Section                            | 632(43.7)  | 43(49.4)                   | 101(49.3)                  | 664(57.6)                      | 0.101     |
| Vaginal birth                                | 812(56.2)  | 44(50.6)                   | 104(50.7)                  | 488(42.4)                      |           |
| <b>Socio-economic status</b>                 |            |                            |                            |                                |           |
| City                                         |            |                            |                            |                                |           |
| Wuxi                                         | 480(33.2)  | 25(28.7)                   | 92(44.9)                   | 363(31.5)                      | <0.001*** |
| Taiyuan                                      | 484(33.5)  | 2(2.3)                     | 16(7.8)                    | 466(40.5)                      |           |
| Bingzhou                                     | 480(33.3)  | 60(69.0)                   | 97(47.3)                   | 323(28.0)                      |           |
| Mother's higher education                    |            |                            |                            |                                |           |
| Yes                                          | 827(57.3)  | 53(60.9)                   | 143(69.8)                  | 631(54.8)                      | <0.001*** |
| No                                           | 617(42.7)  | 34(39.1)                   | 62(30.2)                   | 521(45.2)                      |           |
| Father's higher education                    |            |                            |                            |                                |           |
| Yes                                          | 880(60.9)  | 45(51.7)                   | 151(73.7)                  | 684(59.4)                      | <0.001*** |
| No                                           | 564(39.1)  | 42(48.3)                   | 54(26.3)                   | 468(40.6)                      |           |
| Mother's occupation                          |            |                            |                            |                                |           |
| Skilled                                      | 824(57.1)  | 45(51.7)                   | 124(60.5)                  | 655(56.9)                      | 0.365     |
| Non-skilled                                  | 620(42.9)  | 42(48.3)                   | 81(39.5)                   | 497(43.1)                      |           |
| Father's occupation                          |            |                            |                            |                                |           |
| Skilled                                      | 869(60.2)  | 46(52.9)                   | 129(62.9)                  | 694(60.2)                      | 0.275     |
| Non-skilled                                  | 575(39.8)  | 41(47.1)                   | 76(37.1)                   | 458(39.8)                      |           |

<sup>a</sup> Gestational week

<sup>b</sup> Chi-square analysis

\* $P < 0.05$ , \*\*  $P < 0.01$ , \*\*\*  $P < 0.001$

1  
2  
3  
4  
5  
6  
7  
8  
9  
10  
11  
12  
13  
14  
15  
16  
17  
18  
19  
20  
21  
22  
23  
24  
25  
26  
27  
28  
29  
30  
31  
32  
33  
34  
35  
36  
37  
38  
39  
40  
41  
42  
43  
44  
45  
46  
47

**Table 2**  
Multivariate Linear Regression of Factors Associated With Bayley III Cognitive Development Scores

| Characteristic              | $\beta^a(95\%CI)$        | $\beta^b(95\%CI)$       | $\beta^c(95\%CI)$       | $\beta^d(95\%CI)$       |
|-----------------------------|--------------------------|-------------------------|-------------------------|-------------------------|
| <b>All subjects(n=1444)</b> |                          |                         |                         |                         |
| Full term <sup>c</sup>      | Ref                      | Ref                     | Ref                     | Ref                     |
| Born at 37 gestational week | -1.213 (-2.718, 0.291)   | -1.102(-2.604,0.400)    | -0.950(-2.458, 0.557)   | -0.620(-2.124, 0.885)   |
| Born at 38 gestational week | 0.968(-0.058,1.994)      | 0.997(-0.026,2.021)     | 0.963(-0.060, 1.986)    | 0.770(-0.248, 1.789)    |
| <b>Infants(n=844)</b>       |                          |                         |                         |                         |
| Full term <sup>c</sup>      | Ref                      | Ref                     | Ref                     | Ref                     |
| Born at 37 gestational week | -2.810 (-4.847,-0.774)** | -2.723(-4.765,-0.680)** | -2.545(-4.590, -0.500)* | -2.257(-4.280, -0.235)* |
| Born at 38 gestational week | 0.450(-0.853,1.768)      | 0.532(-0.780,1.844)     | 0.548(-0.765, 1.861)    | 0.120(-1.180, 1.421)    |
| <b>Toddlers(n=600)</b>      |                          |                         |                         |                         |
| Full term <sup>c</sup>      | Ref                      | Ref                     | Ref                     | Ref                     |
| Born at 37 gestational week | 0.623(-1.618,2.863)      | 0.639(-1.567,2.874)     | 0.720(-1.528,2.969)     | 0.935(-1.356,3.225)     |
| Born at 38 gestational week | 1.720(0.075,3.366)*      | 1.671(0.032,3.250)      | 1.449 (-0.140,3.139)    | 1.418(-0.243,3.076)     |

<sup>a</sup> Not adjusted for other variables

<sup>b</sup> Adjusted for children’s characteristic (weight for length Z-score , gender ,)

<sup>c</sup> Adjusted for children’s and maternal characteristic (delivery mode, parity, maternal age)

<sup>d</sup> Adjusted for children’s and maternal characteristic, and socio-economic factors (city, mother’ s and father’s education and occupation)

<sup>e</sup> Children born at 39-41 gestational weeks

\* $p < 0.05$ , \*\* $p < 0.01$

1  
2  
3  
4  
5 **Figure 1. Number of infants and toddlers who completed the questionnaire and tests**

6  
7 **Figure 2. Cognitive composite scores by gestational week in the study are expressed as means and 95% confidence**  
8 **intervals(n=1444)**  
9

10  
11  
12  
13  
14  
15  
16  
17  
18  
19  
20  
21  
22  
23  
24  
25  
26  
27  
28  
29  
30  
31  
32  
33  
34  
35  
36  
37  
38  
39  
40  
41  
42  
43  
44  
45  
46  
47

For peer review only



1  
2  
3  
4  
5  
6  
7  
8  
9  
10  
11  
12  
13  
14  
15  
16  
17  
18  
19  
20  
21  
22  
23  
24  
25  
26  
27  
28  
29  
30  
31  
32  
33  
34  
35  
36  
37  
38  
39  
40  
41  
42  
43  
44  
45  
46  
47  
48  
49  
50  
51  
52  
53  
54  
55  
56  
57  
58  
59  
60

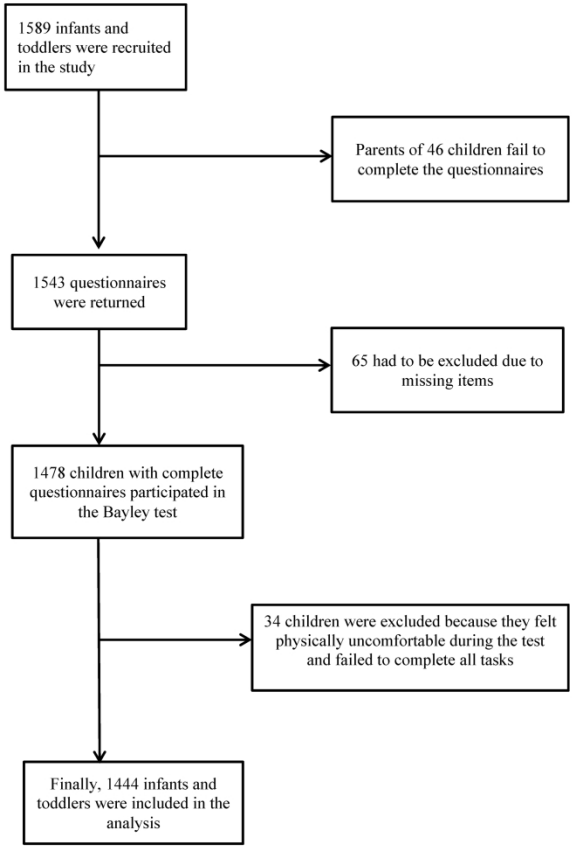

Figure 1. Number of infants and toddlers who completed the questionnaire and tests  
279x361mm (300 x 300 DPI)

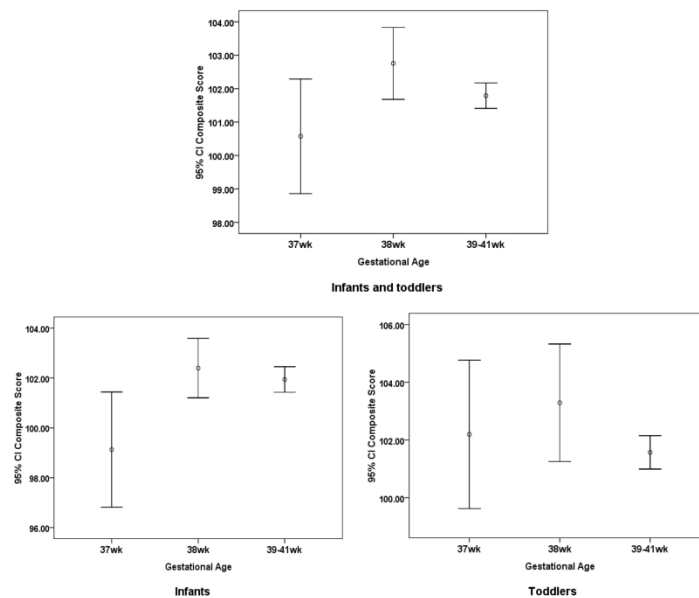

Figure 2. Cognitive composite scores by gestational week in the study are expressed as means and 95% confidence intervals(n=1444)

279x361mm (300 x 300 DPI)

## STROBE Statement—checklist of items that should be included in reports of observational studies

|                              | Item No | Recommendation                                                                                                                                                                                                                                                                                                                                                                                                                                                         | On page      |
|------------------------------|---------|------------------------------------------------------------------------------------------------------------------------------------------------------------------------------------------------------------------------------------------------------------------------------------------------------------------------------------------------------------------------------------------------------------------------------------------------------------------------|--------------|
| <b>Title and abstract</b>    | 1       | (a) Indicate the study's design with a commonly used term in the title or the abstract                                                                                                                                                                                                                                                                                                                                                                                 | 1, 2         |
|                              |         | (b) Provide in the abstract an informative and balanced summary of what was done and what was found                                                                                                                                                                                                                                                                                                                                                                    | 2            |
| <b>Introduction</b>          |         |                                                                                                                                                                                                                                                                                                                                                                                                                                                                        |              |
| Background/rationale         | 2       | Explain the scientific background and rationale for the investigation being reported                                                                                                                                                                                                                                                                                                                                                                                   | 3,4          |
| Objectives                   | 3       | State specific objectives, including any prespecified hypotheses                                                                                                                                                                                                                                                                                                                                                                                                       | 5            |
| <b>Methods</b>               |         |                                                                                                                                                                                                                                                                                                                                                                                                                                                                        |              |
| Study design                 | 4       | Present key elements of study design early in the paper                                                                                                                                                                                                                                                                                                                                                                                                                | 5            |
| Setting                      | 5       | Describe the setting, locations, and relevant dates, including periods of recruitment, exposure, follow-up, and data collection                                                                                                                                                                                                                                                                                                                                        | 5,6,7        |
| Participants                 | 6       | (a) <i>Cohort study</i> —Give the eligibility criteria, and the sources and methods of selection of participants. Describe methods of follow-up<br><i>Case-control study</i> —Give the eligibility criteria, and the sources and methods of case ascertainment and control selection. Give the rationale for the choice of cases and controls<br><i>Cross-sectional study</i> —Give the eligibility criteria, and the sources and methods of selection of participants | 5            |
|                              |         | (b) <i>Cohort study</i> —For matched studies, give matching criteria and number of exposed and unexposed<br><i>Case-control study</i> —For matched studies, give matching criteria and the number of controls per case                                                                                                                                                                                                                                                 |              |
| Variables                    | 7       | Clearly define all outcomes, exposures, predictors, potential confounders, and effect modifiers. Give diagnostic criteria, if applicable                                                                                                                                                                                                                                                                                                                               | 4,5,6        |
| Data sources/<br>measurement | 8*      | For each variable of interest, give sources of data and details of methods of assessment (measurement). Describe comparability of assessment methods if there is more than one group                                                                                                                                                                                                                                                                                   |              |
| Bias                         | 9       | Describe any efforts to address potential sources of bias                                                                                                                                                                                                                                                                                                                                                                                                              | 5,7,8        |
| Study size                   | 10      | Explain how the study size was arrived at                                                                                                                                                                                                                                                                                                                                                                                                                              | 5            |
| Quantitative variables       | 11      | Explain how quantitative variables were handled in the analyses. If applicable, describe which groupings were chosen and why                                                                                                                                                                                                                                                                                                                                           | 6,7          |
| Statistical methods          | 12      | (a) Describe all statistical methods, including those used to control for confounding                                                                                                                                                                                                                                                                                                                                                                                  | 7,8          |
|                              |         | (b) Describe any methods used to examine subgroups and interactions                                                                                                                                                                                                                                                                                                                                                                                                    | 7,8          |
|                              |         | (c) Explain how missing data were addressed                                                                                                                                                                                                                                                                                                                                                                                                                            | 5, Figure 1. |
|                              |         | (d) <i>Cohort study</i> —If applicable, explain how loss to follow-up was addressed<br><i>Case-control study</i> —If applicable, explain how matching of cases and controls was addressed<br><i>Cross-sectional study</i> —If applicable, describe analytical methods taking account of sampling strategy                                                                                                                                                              | 7,8          |
|                              |         | (e) Describe any sensitivity analyses                                                                                                                                                                                                                                                                                                                                                                                                                                  |              |

Continued on next page

| <b>Results</b>           |     |                                                                                                                                                                                                                                                                                                                                                                                                               | <b>On page</b>                 |
|--------------------------|-----|---------------------------------------------------------------------------------------------------------------------------------------------------------------------------------------------------------------------------------------------------------------------------------------------------------------------------------------------------------------------------------------------------------------|--------------------------------|
| Participants             | 13* | (a) Report numbers of individuals at each stage of study—eg numbers potentially eligible, examined for eligibility, confirmed eligible, included in the study, completing follow-up, and analysed<br>(b) Give reasons for non-participation at each stage<br>(c) Consider use of a flow diagram                                                                                                               | 8<br><br>Figure 1              |
| Descriptive data         | 14* | (a) Give characteristics of study participants (eg demographic, clinical, social) and information on exposures and potential confounders<br>(b) Indicate number of participants with missing data for each variable of interest<br>(c) <i>Cohort study</i> —Summarise follow-up time (eg, average and total amount)                                                                                           | 8<br>5, Figure 1.              |
| Outcome data             | 15* | <i>Cohort study</i> —Report numbers of outcome events or summary measures over time<br><i>Case-control study</i> —Report numbers in each exposure category, or summary measures of exposure<br><i>Cross-sectional study</i> —Report numbers of outcome events or summary measures                                                                                                                             | Table I~IV                     |
| Main results             | 16  | (a) Give unadjusted estimates and, if applicable, confounder-adjusted estimates and their precision (eg, 95% confidence interval). Make clear which confounders were adjusted for and why they were included<br>(b) Report category boundaries when continuous variables were categorized<br>(c) If relevant, consider translating estimates of relative risk into absolute risk for a meaningful time period | 9,10<br>9,10<br>Not applicable |
| Other analyses           | 17  | Report other analyses done—eg analyses of subgroups and interactions, and sensitivity analyses                                                                                                                                                                                                                                                                                                                | 9,10                           |
| <b>Discussion</b>        |     |                                                                                                                                                                                                                                                                                                                                                                                                               |                                |
| Key results              | 18  | Summarise key results with reference to study objectives                                                                                                                                                                                                                                                                                                                                                      | 10                             |
| Limitations              | 19  | Discuss limitations of the study, taking into account sources of potential bias or imprecision. Discuss both direction and magnitude of any potential bias                                                                                                                                                                                                                                                    | 14                             |
| Interpretation           | 20  | Give a cautious overall interpretation of results considering objectives, limitations, multiplicity of analyses, results from similar studies, and other relevant evidence                                                                                                                                                                                                                                    | 11,12                          |
| Generalisability         | 21  | Discuss the generalisability (external validity) of the study results                                                                                                                                                                                                                                                                                                                                         | 10,11,12,13                    |
| <b>Other information</b> |     |                                                                                                                                                                                                                                                                                                                                                                                                               |                                |
| Funding                  | 22  | Give the source of funding and the role of the funders for the present study and, if applicable, for the original study on which the present article is based                                                                                                                                                                                                                                                 | 14                             |

\*Give information separately for cases and controls in case-control studies and, if applicable, for exposed and unexposed groups in cohort and cross-sectional studies.

**Note:** An Explanation and Elaboration article discusses each checklist item and gives methodological background and published examples of transparent reporting. The STROBE checklist is best used in conjunction with this article (freely available on the Web sites of PLoS Medicine at <http://www.plosmedicine.org/>, Annals of Internal Medicine at <http://www.annals.org/>, and Epidemiology at <http://www.epidem.com/>). Information on the STROBE Initiative is available at [www.strobe-statement.org](http://www.strobe-statement.org).

# BMJ Open

## Differentiating the cognitive development of early term births in Chinese infants and toddlers

|                                 |                                                                                                                                                                                                                                                                                                                                                                                                                                                                                                                                                                                                                                                                                                                                                        |
|---------------------------------|--------------------------------------------------------------------------------------------------------------------------------------------------------------------------------------------------------------------------------------------------------------------------------------------------------------------------------------------------------------------------------------------------------------------------------------------------------------------------------------------------------------------------------------------------------------------------------------------------------------------------------------------------------------------------------------------------------------------------------------------------------|
| Journal:                        | <i>BMJ Open</i>                                                                                                                                                                                                                                                                                                                                                                                                                                                                                                                                                                                                                                                                                                                                        |
| Manuscript ID                   | bmjopen-2018-025275.R1                                                                                                                                                                                                                                                                                                                                                                                                                                                                                                                                                                                                                                                                                                                                 |
| Article Type:                   | Research                                                                                                                                                                                                                                                                                                                                                                                                                                                                                                                                                                                                                                                                                                                                               |
| Date Submitted by the Author:   | 01-Jan-2019                                                                                                                                                                                                                                                                                                                                                                                                                                                                                                                                                                                                                                                                                                                                            |
| Complete List of Authors:       | Hua, Jing; Shanghai First Maternity and Infant Hospital, Tongji University School of medicine,<br>Sun, Jie; Shanghai First Maternity and Infant Hospital, Tongji University School of medicine<br>Cao, Zhijuan; Shanghai First Maternity and Infant Hospital, Tongji University School of medicine<br>Dai, Xiaotian; Shanghai First Maternity and Infant Hospital, Tongji University School of medicine<br>Lin, Senran; Shanghai First Maternity and Infant Hospital, Tongji University School of medicine<br>Guo, Jialin; Shanghai First Maternity and Infant Hospital, Tongji University School of medicine<br>Gu, Guixiong; Pediatrics Research Institution of Soochow University<br>Du, Wenchong; Nottingham Trent University, Psychology Division |
| <b>Primary Subject Heading</b>: | Epidemiology                                                                                                                                                                                                                                                                                                                                                                                                                                                                                                                                                                                                                                                                                                                                           |
| Secondary Subject Heading:      | Paediatrics, Public health                                                                                                                                                                                                                                                                                                                                                                                                                                                                                                                                                                                                                                                                                                                             |
| Keywords:                       | Cognitive development, early term, infants and toddlers, China                                                                                                                                                                                                                                                                                                                                                                                                                                                                                                                                                                                                                                                                                         |
|                                 |                                                                                                                                                                                                                                                                                                                                                                                                                                                                                                                                                                                                                                                                                                                                                        |

SCHOLARONE™  
Manuscripts

1  
2  
3  
4 **Differentiating the cognitive development of early term births in**  
5  
6 **Chinese infants and toddlers**  
7  
8  
9

10  
11 Jing Hua<sup>1†\*</sup>, Jie Sun<sup>1†</sup>, Zhijuan Cao<sup>1†</sup>, Xiaotian Dai<sup>1</sup>, Senran Lin<sup>1</sup>, Jialin Guo<sup>1†</sup>,  
12 Guixiong Gu<sup>2\*</sup>, Wenchong Du<sup>3</sup>  
13

14 \*Co-Corresponding author:  
15

16  
17 Jing Hua, Shanghai First Maternity and Infant Hospital, Tongji University School of  
18 Medicine P.O. 2699 Gaoke Road, 200042 Shanghai, China, Fax: 086-021-20261428, Email:  
19 szhuaj@hotmail.com, Jing Hua. Guixiong Gu, Pediatrics Research Institution of Soochow  
20 University; P.O. 303 Jingde Road, 215003 Suzhou, China E-mail Phone: 086-0512-80696526  
21 Email: szggx000@163.com.  
22  
23  
24  
25  
26  
27

28 <sup>1</sup>Shanghai First Maternity and Infant Hospital, Tongji University School of Medicine,  
29 Shanghai, China;  
30

31 <sup>2</sup>Pediatrics Research Institution of Soochow University, Suzhou, China;  
32

33 <sup>3</sup>Psychology Division, Nottingham Trent University, Chaucer Building 4013,  
34 Nottingham, UK  
35  
36  
37  
38

39 †These authors contributed equally to this work.  
40  
41  
42  
43  
44  
45  
46  
47  
48  
49  
50  
51  
52  
53  
54  
55  
56  
57  
58  
59  
60

## ABSTRACT

**Objectives:** This study aimed to explore the cognitive development of low-risk children during early childhood for early term births at 37 and 38 weeks of gestation compared to full term births at 39-41 weeks of gestation.

**Setting and Participants:** We conducted a cross-sectional study in Shanghai, one of the largest cities in China. A total of 1444 children from singleton pregnancies born at term gestation were included in the study.

**Measures:** The cognitive outcomes of the subjects were measured using the cognitive subtest of Bayley Scales of Infant and toddler Development-third Edition (BSID-III) across three cities in China. We analyzed the association between gestational age and cognitive development during infancy and toddler stages using multivariate linear modeling.

**Results:** The cognitive development scores for infants born at 37 gestational weeks were significantly lower than those born at 39 to 41 gestational weeks ( $\beta=-2.257$ , 95%CI:-4.280 to -0.235;  $p<0.05$ ) after adjusting for children's and maternal characteristics, as well as socio-economic factors. However, there were no significant differences in cognitive ability between infants born at 38 gestational weeks compared to their full-term counterparts ( $p>0.05$ ). Moreover, these effects were not found in toddlers (between 17 and 48 months of age) after adjusting for the possible confounders ( $p>0.05$ ).

**Conclusions:** Infants born at 37 weeks of gestation exhibited weaker cognitive ability compared with those born at 39-41 weeks of gestation. Our findings provide evidences for the close monitoring of potential developmental problems in early term children, especially those born at 37 gestational weeks.

**Keywords:** Cognitive development; early term, infants and toddlers; China

#### Strengths and limitations of this study

- Our findings extend the limited available literature on the relationship of gestational age with cognitive developmental scores. Infants born at 37 weeks of gestation had significantly weaker cognitive ability compared with their full-term counterparts.
- Our finding provided evidences for the close monitoring of potential developmental problems in early term children, especially in those born at 37 gestational weeks.
- The sample size was relatively small in our study (n=1444), and the results were not consistent across different age groups. Further studies are needed in order to verify this result.
- Although we examined a number of potential confounders, several other confounding factors were not measured. For instance, the detailed maternal and obstetric factors for early-term deliveries were not available in our study.



## INTRODUCTION

It had been previously believed that children born between 37 and 41 weeks of gestational age share similar health outcomes, therefore including them in the same low-risk group.<sup>1</sup> In 2012, the American Academy of Pediatrics recommended that births occurring between 37 weeks 0 days and 38 weeks 6 days be defined as early term, while those from 39 weeks 0 days through to 40 weeks 6 days as full term.<sup>2</sup> Approximately 27.6% of all births in the United States are early term,<sup>3,4</sup> far exceeding the number of preterm births.<sup>4,5</sup> Many studies have reported that early-term births are associated with higher neonatal morbidity and higher probability of NICU admission compared with their full term counterparts (> 38 gestational weeks).<sup>6</sup> Early term children also have increased susceptibility to various metabolic, neurologic and respiratory diseases.<sup>7-9</sup>

Recently, research into the effect of gestational age on developmental outcomes has directed attention to the investigation of early term infants.<sup>10</sup> There have been increasing reports which show that early term births resulted in worsened cognitive and academic outcomes compared to those born at 39 weeks or later.<sup>1,10-13</sup> A systematic review showed that full-term cohorts performed 3% of a standard deviation higher in cognitive outcome than early term cohorts<sup>10</sup>. The gestation period between 37-40 weeks was associated with neuromotor and cognitive development in 9- to 15-week-old and 12-month-old infants.<sup>13,14</sup> Early term birth was associated with an increased risk of worsened academic achievements at ages 5 to 7 years.<sup>15,16</sup>

1  
2  
3  
4 However, on the basis of recent research,<sup>13,17-19</sup> the exact boundary which  
5  
6 separates early term and full term gestation periods should be carefully examined  
7  
8 because of its implications for neonatal and developmental outcomes. The highest risk  
9  
10 of mortality was observed for children born at 37 gestational weeks, but not for those  
11  
12 born at 38 gestational weeks.<sup>19</sup> Furthermore, a prospective cohort study in Belarus  
13  
14 showed that children born at 37 gestational weeks had a significantly lower full-scale  
15  
16 intelligence quotient (IQ) score compared with those born at 39-41 weeks, however,  
17  
18 this difference was not observed in children born at 38 gestational weeks.<sup>20</sup> Moreover,  
19  
20 in a large sample of healthy infants, there was a significant difference in the mental  
21  
22 development index (MDI) between infants born at 37 and 38 gestational weeks, but  
23  
24 almost no difference between those born at 38 and 39 gestational weeks.<sup>13</sup> However,  
25  
26 the degree to which earlier gestational age confers risk among infants born at term  
27  
28 from 37 to 41 weeks of gestation remains unclear.<sup>12,20,21</sup>  
29  
30  
31  
32  
33  
34  
35  
36  
37

38 In this study, we used a cross-sectional study design to examine a sample of urban  
39  
40 Chinese singleton pregnancies born at term gestation. We hypothesized that early  
41  
42 term births may result in significant cognitive delay, especially those born at 37  
43  
44 gestational weeks. We further examined the differences in cognitive ability in both  
45  
46 infants and toddlers across various term births in order to determine the true  
47  
48 underlying risk across different gestational weeks. The aim of the study is: 1) to  
49  
50 differentiate the cognitive development of children born at 37, 38 and 39-41  
51  
52 gestational weeks; 2) to independently analyze the effects of gestational weeks on  
53  
54 cognitive development in both short-term (infants) and long term (toddlers), in order  
55  
56  
57  
58  
59  
60

1  
2  
3  
4 to provide evidences for the close monitoring of potential developmental problems in  
5  
6 early term children.  
7  
8  
9

## 10 11 **MATERIALS AND METHODS**

### 12 13 14 **Participants**

15  
16 We conducted a cross-sectional study in mainland China from May to December of  
17  
18 2011. We used a stratified sampling technique, with area, gender, and months of age  
19  
20 as stratification variables. A total of 1589 children aged between 16 days to 42  
21  
22 months were selected from 3 children's healthcare institutions in medium-sized cities  
23  
24 distributed across 3 geographic regions: North China, Middle China, and East China.  
25  
26 The selection of age bands was based on the categories proposed in the Bayley-III  
27  
28 technical manual (totaling 48 age bands). The inclusion criteria for infants and  
29  
30 toddlers included: singleton and born at term, born without significant medical  
31  
32 complications, did not have a history of medical complications, and not currently  
33  
34 diagnosed with or receiving treatment for mental, physical or behavioral difficulties.  
35  
36 The exclusion criteria included: confounding conditions or developmental risk factors  
37  
38 such as abnormal hearing or vision, taking medications that could affect performance  
39  
40 or admission to hospital at the time of testing, and any other problems involving  
41  
42 nutrition, sleep or infections during the clinical visit. Of the 1589 eligible children  
43  
44 who were recruited, a total of 1444 children were included for the study (Figure 1).  
45  
46  
47  
48  
49  
50  
51  
52  
53  
54  
55  
56 All information was kept confidential and was only accessible to the researchers.  
57  
58  
59  
60

## **Patient and Public Involvement**

None of the patients were involved in the research design or development of the research question and outcome measures. They were also not involved in the recruitment and conduct of the study. The results of the study would be disseminated to study participants by means of the participating children's healthcare institutions.

## **Measurements**

The Bayley Scale of Infant and Toddler Development, Third Edition (Bayley-III) is an individually administered scale that assesses five key developmental domains in children between 1-42 months of age: cognition, language (receptive and expressive communication), motor (gross and fine), social-emotional and adaptive behavior. The first three domains are assessed through direct observation of the child in test situations, while the last two are assessed through questionnaires to be completed by the main caregiver. We first obtained formal permission to translate and validate the Bayley-III scale from the American publishers of this tool (Pearson). We then started developing a Chinese version of Bayley-III, following the recommendations of Hambleton and Patsula (1999), and Herdman, Fox-Rushby and Badia (1998) for the translation and adaptation of a test, taking into consideration conceptual, item, semantic, operational, measurement and functional equivalences. Each step of this process was presented in the results section. The Chinese version of the BSID-III was translated by a native Chinese speaker and independent professional who adapted the items into context and culture. Subsequently, the final Chinese version of the

1  
2  
3  
4 BSID-III was retranslated into English by two native English speakers who were  
5  
6 blinded to the original version. The test manual and materials will utilize the same  
7  
8 trademark, logo, and design as used on the English version of the test. We have  
9  
10 explored the reliability and validity of the Bayley-III cognitive scale in a parallel  
11  
12 study, which showed a good to excellent reliability of the Bayley-III cognitive scale  
13  
14 (e.g. the coefficients of inter-item consistency were more than 0.75; the test-retest and  
15  
16 inter-rater reliability of the scale were more than 0.90). The content, construct and  
17  
18 known-group validity of Bayley-III cognitive scale were also sufficient in the parallel  
19  
20 study. Additionally, gestational age is measured as the age of a pregnancy which was  
21  
22 taken from the woman's last menstrual period, records of which were obtained from  
23  
24 the hospital's medical record registration system following confirmation by  
25  
26 ultrasound exam.  
27  
28  
29  
30  
31  
32  
33  
34  
35  
36  
37

### 38 **Procedure**

39  
40 The survey was conducted during the well-child visits in the participating children's  
41  
42 healthcare institutions. Nurses who took part in the check in and physical examination  
43  
44 (weight, height and head circumference) were responsible for handing out the  
45  
46 questionnaires to the children's parents. Six developmental pediatricians were trained  
47  
48 to administrate the Bayley-III cognitive scale. The testers had become familiar with  
49  
50 the test guidance by carrying out a series of practice assessments on several children  
51  
52 who did not take part in the study. Any problems associated with test administration  
53  
54 during the training period were clarified by the administrator of this study prior to the  
55  
56  
57  
58  
59  
60

1  
2  
3  
4 test. The test environment was quiet and non-interfering, and all infants and toddlers  
5  
6 needed to be calm, stable and satiated. The tester encouraged the infants and toddlers  
7  
8 to display their highest level of ability during the test. A trained pediatrician took the  
9  
10 responsibility for conducting the entire test for each child in order to maximize both  
11  
12 interpretation validity and assessment reliability.  
13  
14  
15

### 16 17 18 19 **Statistical analysis**

20  
21 All analyses were performed using SPSS 17.0 software. Chi-square analyses were  
22  
23 used for comparing children and maternal characteristics between those born at 37 or  
24  
25 38 gestational weeks and those born at full term (39-41 gestational weeks). Means of  
26  
27 cognitive scores among different gestational weeks was evaluated using one-way  
28  
29 ANOVA and post-hoc comparison. Multivariate linear regression was used to test the  
30  
31 relationship between gestational age and cognitive developmental scores, taking into  
32  
33 account potential confounding variables including gender, weight-for-length Z-scores,  
34  
35 parity, mother's age, delivery mode, parents' education and occupation. Social  
36  
37 economic factors were not included because they were highly correlated with parental  
38  
39 occupation.  $p < 0.05$  was considered statistically significant.  
40  
41  
42  
43  
44  
45  
46  
47  
48  
49

### 50 51 **RESULTS**

52  
53 Of the 1444 children included in the study, 844 were infants aged between 16 days  
54  
55 after birth to 16 months (58.4%), and 600 were toddlers aged between 17 months to  
56  
57 48 months (41.6%). Among these subjects, 1152 (79.8%) were full term births, 87  
58  
59  
60

1  
2  
3  
4 (6.02%) were born at 37 gestational weeks, and 205 (14.2%) were born at 38  
5  
6 gestational weeks. The mean cognitive composite score was 101.9, with a standard  
7  
8 deviation of 6.9. The parity, the family's city of residence, and parents' education  
9  
10 were significantly different among those born at 37, 38 and 39-41 gestational ages  
11  
12 (Table 1).  
13  
14  
15

16  
17 The cognitive composite score was expressed as means and 95% confidence  
18  
19 interval (Figure 2). In infants aged between 16 days to 16 months, the cognitive  
20  
21 composite score for those born at 37 gestational weeks of age was significantly lower  
22  
23 than those born at 39-41 gestation weeks ( $p < 0.05$ ).  
24  
25  
26

27 Using multivariate linear regression model, cognitive composite scores for children  
28  
29 born at 37 weeks decreased 2.810 (95%CI:-4.847 to -0.774) when compared with  
30  
31 those born at 39-41 gestational weeks during infancy with statistical significance  
32  
33 ( $p = 0.007$ ) without adjusting for ( $\beta = -2.810$ , . The effects remained when adjusting for  
34  
35 the children's characteristics only ( $\beta = -2.723$ , 95%CI:-4.765 to -0.680;  $p = 0.009$ ), or in  
36  
37 combination with maternal characteristics ( $\beta = -2.545$ , 95%CI:-4.590 to -0.500;  
38  
39  $p = 0.015$ ), as well as socio-economic factors ( $\beta = -2.257$ , 95%CI:-4.280 to -0.235;  
40  
41  $p = 0.029$ ; Table 2).  
42  
43  
44  
45  
46  
47

48 However, in toddlers aged between 17 months to 48 months (Table 2), there were  
49  
50 almost no statistically significant associations between those born at 37 or 38  
51  
52 gestational weeks to those born in full term (39-41 gestational weeks). The only  
53  
54 difference was a slightly higher composite cognitive score ( $\beta = 1.723$ , 95%CI: 0.075 to  
55  
56 3.366;  $p = 0.041$ ) in toddlers born at 38 gestational weeks compared to those born in full  
57  
58  
59  
60

1  
2  
3  
4 term, when not adjusting for any other variables. The effects disappeared when  
5  
6 adjusting the other variables.  
7  
8  
9

## 10 11 **DISCUSSION**

12  
13  
14 To our knowledge, our paper is the first in China and one of few studies in the world  
15  
16 to report on the short- and long-term neurobehavioral outcomes of early term children.  
17  
18 A weaker cognitive ability was observed in infants born at 37 gestational weeks  
19  
20 compared with their full-term (born at 39-41 gestational weeks) counterparts. Our  
21  
22 findings extend the limited available literature on the relationship of gestational age to  
23  
24 cognitive developmental scores.  
25  
26  
27  
28  
29

30 In our study, we found that the effect of early term birth (37 gestational weeks)  
31  
32 persisted in infancy even when a broad range of confounders including parental  
33  
34 characteristics were considered. The mechanisms underlying the effect of early term  
35  
36 birth on cognitive development scores may be multifactorial. The intrauterine and  
37  
38 extrauterine environments differ dramatically in relationship to maternal and placental  
39  
40 hormones, which may play an important role in brain development.<sup>13</sup> The intrauterine  
41  
42 environment supports typical brain development, which is more likely to be disrupted  
43  
44 in children born during early term gestation.<sup>12</sup> Moreover, brain development occurs in  
45  
46 a very specific order and time frame.<sup>10</sup> The volume of total grey matter increases by  
47  
48 approximately 1.4% per week from 29 to 41 weeks of gestation, while the volume of  
49  
50 white matter sees a fivefold increase between 35 and 41 weeks of gestation.<sup>15,22</sup>  
51  
52  
53  
54  
55  
56  
57  
58  
59  
60  
61  
62  
63  
64  
65  
66  
67  
68  
69  
70  
71  
72  
73  
74  
75  
76  
77  
78  
79  
80  
81  
82  
83  
84  
85  
86  
87  
88  
89  
90  
91  
92  
93  
94  
95  
96  
97  
98  
99  
100  
101  
102  
103  
104  
105  
106  
107  
108  
109  
110  
111  
112  
113  
114  
115  
116  
117  
118  
119  
120  
121  
122  
123  
124  
125  
126  
127  
128  
129  
130  
131  
132  
133  
134  
135  
136  
137  
138  
139  
140  
141  
142  
143  
144  
145  
146  
147  
148  
149  
150  
151  
152  
153  
154  
155  
156  
157  
158  
159  
160  
161  
162  
163  
164  
165  
166  
167  
168  
169  
170  
171  
172  
173  
174  
175  
176  
177  
178  
179  
180  
181  
182  
183  
184  
185  
186  
187  
188  
189  
190  
191  
192  
193  
194  
195  
196  
197  
198  
199  
200  
201  
202  
203  
204  
205  
206  
207  
208  
209  
210  
211  
212  
213  
214  
215  
216  
217  
218  
219  
220  
221  
222  
223  
224  
225  
226  
227  
228  
229  
230  
231  
232  
233  
234  
235  
236  
237  
238  
239  
240  
241  
242  
243  
244  
245  
246  
247  
248  
249  
250  
251  
252  
253  
254  
255  
256  
257  
258  
259  
260  
261  
262  
263  
264  
265  
266  
267  
268  
269  
270  
271  
272  
273  
274  
275  
276  
277  
278  
279  
280  
281  
282  
283  
284  
285  
286  
287  
288  
289  
290  
291  
292  
293  
294  
295  
296  
297  
298  
299  
300  
301  
302  
303  
304  
305  
306  
307  
308  
309  
310  
311  
312  
313  
314  
315  
316  
317  
318  
319  
320  
321  
322  
323  
324  
325  
326  
327  
328  
329  
330  
331  
332  
333  
334  
335  
336  
337  
338  
339  
340  
341  
342  
343  
344  
345  
346  
347  
348  
349  
350  
351  
352  
353  
354  
355  
356  
357  
358  
359  
360  
361  
362  
363  
364  
365  
366  
367  
368  
369  
370  
371  
372  
373  
374  
375  
376  
377  
378  
379  
380  
381  
382  
383  
384  
385  
386  
387  
388  
389  
390  
391  
392  
393  
394  
395  
396  
397  
398  
399  
400  
401  
402  
403  
404  
405  
406  
407  
408  
409  
410  
411  
412  
413  
414  
415  
416  
417  
418  
419  
420  
421  
422  
423  
424  
425  
426  
427  
428  
429  
430  
431  
432  
433  
434  
435  
436  
437  
438  
439  
440  
441  
442  
443  
444  
445  
446  
447  
448  
449  
450  
451  
452  
453  
454  
455  
456  
457  
458  
459  
460  
461  
462  
463  
464  
465  
466  
467  
468  
469  
470  
471  
472  
473  
474  
475  
476  
477  
478  
479  
480  
481  
482  
483  
484  
485  
486  
487  
488  
489  
490  
491  
492  
493  
494  
495  
496  
497  
498  
499  
500  
501  
502  
503  
504  
505  
506  
507  
508  
509  
510  
511  
512  
513  
514  
515  
516  
517  
518  
519  
520  
521  
522  
523  
524  
525  
526  
527  
528  
529  
530  
531  
532  
533  
534  
535  
536  
537  
538  
539  
540  
541  
542  
543  
544  
545  
546  
547  
548  
549  
550  
551  
552  
553  
554  
555  
556  
557  
558  
559  
560  
561  
562  
563  
564  
565  
566  
567  
568  
569  
570  
571  
572  
573  
574  
575  
576  
577  
578  
579  
580  
581  
582  
583  
584  
585  
586  
587  
588  
589  
590  
591  
592  
593  
594  
595  
596  
597  
598  
599  
600  
601  
602  
603  
604  
605  
606  
607  
608  
609  
610  
611  
612  
613  
614  
615  
616  
617  
618  
619  
620  
621  
622  
623  
624  
625  
626  
627  
628  
629  
630  
631  
632  
633  
634  
635  
636  
637  
638  
639  
640  
641  
642  
643  
644  
645  
646  
647  
648  
649  
650  
651  
652  
653  
654  
655  
656  
657  
658  
659  
660  
661  
662  
663  
664  
665  
666  
667  
668  
669  
670  
671  
672  
673  
674  
675  
676  
677  
678  
679  
680  
681  
682  
683  
684  
685  
686  
687  
688  
689  
690  
691  
692  
693  
694  
695  
696  
697  
698  
699  
700  
701  
702  
703  
704  
705  
706  
707  
708  
709  
710  
711  
712  
713  
714  
715  
716  
717  
718  
719  
720  
721  
722  
723  
724  
725  
726  
727  
728  
729  
730  
731  
732  
733  
734  
735  
736  
737  
738  
739  
740  
741  
742  
743  
744  
745  
746  
747  
748  
749  
750  
751  
752  
753  
754  
755  
756  
757  
758  
759  
760  
761  
762  
763  
764  
765  
766  
767  
768  
769  
770  
771  
772  
773  
774  
775  
776  
777  
778  
779  
780  
781  
782  
783  
784  
785  
786  
787  
788  
789  
790  
791  
792  
793  
794  
795  
796  
797  
798  
799  
800  
801  
802  
803  
804  
805  
806  
807  
808  
809  
810  
811  
812  
813  
814  
815  
816  
817  
818  
819  
820  
821  
822  
823  
824  
825  
826  
827  
828  
829  
830  
831  
832  
833  
834  
835  
836  
837  
838  
839  
840  
841  
842  
843  
844  
845  
846  
847  
848  
849  
850  
851  
852  
853  
854  
855  
856  
857  
858  
859  
860  
861  
862  
863  
864  
865  
866  
867  
868  
869  
870  
871  
872  
873  
874  
875  
876  
877  
878  
879  
880  
881  
882  
883  
884  
885  
886  
887  
888  
889  
890  
891  
892  
893  
894  
895  
896  
897  
898  
899  
900  
901  
902  
903  
904  
905  
906  
907  
908  
909  
910  
911  
912  
913  
914  
915  
916  
917  
918  
919  
920  
921  
922  
923  
924  
925  
926  
927  
928  
929  
930  
931  
932  
933  
934  
935  
936  
937  
938  
939  
940  
941  
942  
943  
944  
945  
946  
947  
948  
949  
950  
951  
952  
953  
954  
955  
956  
957  
958  
959  
960  
961  
962  
963  
964  
965  
966  
967  
968  
969  
970  
971  
972  
973  
974  
975  
976  
977  
978  
979  
980  
981  
982  
983  
984  
985  
986  
987  
988  
989  
990  
991  
992  
993  
994  
995  
996  
997  
998  
999  
1000



1  
2  
3  
4 the brain's neural connections for specific cognitive areas.<sup>23</sup> Even at 38 weeks of  
5  
6 gestation, the brain is still only 90% of full-term weight.<sup>24</sup> However, there have been  
7  
8 no studies about the subtle differences in brain development between infants born at  
9  
10 37 and 38 gestational weeks. Future research is necessary to investigate the  
11  
12 mechanisms behind this phenomenon.  
13  
14  
15

16  
17 Additionally, children who were born early term may have a shorter breastfeeding  
18  
19 duration compared with children born at full term.<sup>15,25-27</sup> The breastfeeding duration  
20  
21 was positively associated with children's cognitive development,<sup>28,29</sup> possibly due to  
22  
23 the abundance of cognition-related nutrients found in breast milk such as  
24  
25 docosahexaenoic (DHA) and arachidonic acid. Shorter breastfeeding duration may  
26  
27 result in an increase in morbidity such as asthma and the number of hospital  
28  
29 admissions, which was associated with a delay in achieving early developmental  
30  
31 milestones that may have an effect educational achievements.<sup>15</sup>  
32  
33  
34  
35  
36

37  
38 This finding further supports the results from previous related research. For  
39  
40 example, the highest mortality rate was observed among children born at 37 weeks of  
41  
42 gestation, which necessitates caution in inducing labor for early term pregnancies (37  
43  
44 weeks of gestation). When gestational age in days was classified as gestational weeks,  
45  
46 the mortality for children born at 37 weeks of gestation was higher compared to  
47  
48 later-term births,<sup>17,30-32</sup> however, children born at 38 weeks of gestation was not  
49  
50 associated with an increased mortality. Thus, the true underlying problems for  
51  
52 children born in week 37, remains unknown. Our findings, combined with these  
53  
54 studies, also provide the evidences for the categorization of early term births. Close  
55  
56  
57  
58  
59  
60

1  
2  
3  
4 monitoring for any signs of developmental problems is of the utmost importance in  
5  
6 children born at 37 gestational weeks.  
7  
8

9         Interestingly, in our study, the problems associated with early term birth was not  
10 found in toddlers (aged between 17 months to 48 months), possibly due to the fact  
11 that the family parenting environment had a greater impact on long-term outcomes,  
12 which ‘weakened’ the association between early term birth and cognitive  
13 development. A previous study showed that the quality of stimulation in the family  
14 environment is crucial for the child's cognitive development.<sup>33</sup> A randomized control  
15 trial suggested that intervention on family environment and maternal competency has  
16 positive effects on child development (including cognitive and motor development).<sup>34</sup>  
17  
18 In China, the effects of home and educational environments can promote the motor  
19 performance in preschoolers.<sup>35</sup>  
20  
21  
22  
23  
24  
25  
26  
27  
28  
29  
30  
31  
32  
33  
34  
35  
36  
37

## 38 **CONCLUSIONS**

39  
40 Our study showed that the cognitive development scores for children born at 37  
41 gestational weeks were significantly lower than those born at 39 to 41 gestation weeks.  
42  
43 Therefore, healthcare professionals need to be more aware of the potential short-term  
44 and long-term care requirements of early term children. Close monitoring for any  
45 signs of health and developmental problems in early term children born at 37  
46 gestational weeks can allow the early detection and timely treatment of borderline  
47 abnormalities, as well as prevent any potential negative health outcomes. However,  
48 because the sample size of our study was relatively small, and the results were not  
49  
50  
51  
52  
53  
54  
55  
56  
57  
58  
59  
60

1  
2  
3  
4 consistent across different age groups. Only early cognitive development was affected  
5  
6 by early term birth, which may provide limited evidence for public health. Further  
7  
8 studies are needed in order to verify these results.  
9  
10

11  
12 Moreover, although we examined a number of potential confounders, several other  
13  
14 confounding factors were not measured. For instance, fetal distress, hypertensive  
15  
16 disorder complicating pregnancy, and gestational diabetes mellitus which may affect  
17  
18 offspring's cognitive development according to the literature. These maternal and  
19  
20 obstetric factors for early-term deliveries were not available in our study, and these  
21  
22 factors will be considered in our further research. Further, the cognitive  
23  
24 developmental scores of children in our study are all normal (above 80 points),  
25  
26 possibly because we selected singletons born at term birth who were mostly at  
27  
28 low-risk.  
29  
30  
31  
32  
33  
34  
35  
36  
37

38 **Acknowledgements** The authors wish to thank all researchers and medical practitioners  
39  
40 who participated in this study for the distribution and collection of the questionnaires,  
41  
42 as well as administrating the cognitive scale testing for children. We also thank Bing  
43  
44 Wang for acquiring the Research Translation License Agreement of the Bayley-3  
45  
46 cognitive scale.  
47  
48  
49  
50  
51  
52

53 **Contributors** JH, JS, ZC and JG contributed to the study design and drafting of the  
54  
55 paper. XD and SL were responsible for literature search, quality control of the testing,  
56  
57 and data collection. WD and GG revised the paper and approved the finalized  
58  
59  
60

1  
2  
3  
4 manuscript submission.  
5  
6  
7  
8

9 **Founding** National Natural Science Foundation of China under Grant (81673179,  
10 81402687), the Shengkang Hospital Development Center under  
11 Grant(SHDC12016239), the Science and Technology Commission of Shanghai  
12 Municipality under Grant (18140903100)  
13  
14  
15  
16  
17  
18

19  
20  
21 **Competing interests** None declared.  
22  
23  
24  
25

26 **Ethics approval** The study received ethical approval from the Local Committee of  
27 Soochow University, China (201101). Written informed consent was obtained from  
28 the parents or legal guardians of the participants prior to the questionnaire survey.  
29  
30  
31  
32  
33  
34  
35  
36  
37  
38  
39  
40  
41  
42  
43  
44  
45  
46  
47  
48  
49  
50  
51  
52  
53  
54  
55  
56  
57  
58  
59  
60  
**Oral parental consents** were obtained prior to investigation and tests.

**Provenance and peer review** Not commissioned; externally peer reviewed.

**Data sharing statement** Data sets generated and/or analysed during the current study  
available from the corresponding author on reasonable request.

**Open Access** This is an Open Access article distributed in accordance with the Creative  
Commons Attribution Non Commercial (CC BY-NC 4.0) license, which permits others to  
distribute, remix, adapt, build upon this work non-commercially, and license their derivative  
works on different terms, provided the original work is properly cited and the use is  
non-commercial. See: <http://creativecommons.org/licenses/by-nc/4.0/>

1  
2  
3  
4 **Conflict of interest statement**

5 None declared.  
6  
7  
8  
9  
10  
11  
12  
13  
14  
15  
16  
17  
18  
19  
20  
21  
22  
23  
24  
25  
26  
27  
28  
29  
30  
31  
32  
33  
34  
35  
36  
37  
38  
39  
40  
41  
42  
43  
44  
45  
46  
47  
48  
49  
50  
51  
52  
53  
54  
55  
56  
57  
58  
59  
60

For peer review only

## References

- 1 Sengupta S, Carrion V, Shelton J, Wynn RJ, Ryan RM, Singhal K, et al. Adverse Neonatal Outcomes Associated With Early-Term Birth. *JAMA Pediatrics* 2013;**167**(11):1053 doi: 10.1001/jamapediatrics.2013.2581published Online First.
- 2 Spong CY. Defining “Term” Pregnancy. *Jama* 2013;**309**(23):2445 doi: 10.1001/jama.2013.6235published Online First.
- 3 Martin JA, Hamilton BE, Sutton PD, Ventura SJ, Mathews TJ, Kirmeyer S, et al. Births: final data for 2007. *Natl Vital Stat Rep* 2010;**58**(24):1-85 Online First: 2011/01/25].
- 4 Martin JA, Hamilton BE, Ventura SJ, Osterman MJ, Kirmeyer S, Mathews TJ, et al. Births: final data for 2009. *Natl Vital Stat Rep* 2011;**60**(1):1-70 Online First: 2012/06/08].
- 5 Mally PV, Agathis NT, Bailey SM. Early term infants are at increased risk of requiring neonatal intensive care. *World journal of pediatrics : WJP* 2016;**12**(1):76-81 doi: 10.1007/s12519-015-0049-8published Online First.
- 6 Craighead DV. Early term birth: understanding the health risks to infants. *Nursing for women's health* 2012;**16**(2):136-144; quiz 145 doi: 10.1111/j.1751-486X.2012.01719.xpublished Online First.
- 7 Schonhaut L, Armijo I, Perez M. Gestational age and developmental risk in moderately and late preterm and early term infants. *Pediatrics* 2015;**135**(4):e835-841 doi: 10.1542/peds.2014-1957published Online First.
- 8 Rabie NZ, Bird TM, Magann EF, Hall RW, McKelvey SS. ADHD and developmental speech/language disorders in late preterm, early term and term infants. *Journal of perinatology : official journal of the California Perinatal Association* 2015;**35**(8):660-664 doi: 10.1038/jp.2015.28published Online First.
- 9 Goyal NK, Attanasio LB, Kozhimannil KB. Hospital care and early breastfeeding outcomes among late preterm, early-term, and term infants. *Birth* 2014;**41**(4):330-338 doi: 10.1111/birt.12135published Online First.
- 10 Chan E, Leong P, Malouf R, Quigley MA. Long-term cognitive and school outcomes of late-preterm and early-term births: a systematic review. *Child: Care, Health and Development* 2016;**42**(3):297-312 doi: 10.1111/cch.12320published Online First.
- 11 Richards JL, Drews-Botsch C, Sales JM, Flanders WD, Kramer MR. Describing the Shape of the Relationship Between Gestational Age at Birth and Cognitive Development in a Nationally Representative U.S. Birth Cohort. *Paediatric and Perinatal Epidemiology* 2016;**30**(6):571-582 doi: 10.1111/ppe.12319published Online First.
- 12 Noble KG, Fifer WP, Rauh VA, Nomura Y, Andrews HF. Academic Achievement Varies With Gestational Age Among Children Born at Term.

- 1  
2  
3 *Pediatrics* 2012;**130**(2):e257-e264 doi:  
4 10.1542/peds.2011-2157published Online First.  
5  
6 13 Rose O, Blanco E, Martinez SM, Sim EK, Castillo M, Lozoff B, et al.  
7 Developmental scores at 1 year with increasing gestational age, 37-41  
8 weeks. *Pediatrics* 2013;**131**(5):e1475-1481 doi:  
9 10.1542/peds.2012-3215published Online First.  
10  
11 14 van Batenburg-Eddes T, de Groot L, Arends L, de Vries A, Moll HA, Steegers  
12 EA, et al. Does gestational duration within the normal range predict infant  
13 neuromotor development? *Early human development*  
14 2008;**84**(10):659-665 doi: 10.1016/j.earlhumdev.2008.04.007published  
15 Online First.  
16  
17 15 Quigley MA, Poulsen G, Boyle E, Wolke D, Field D, Alfirevic Z, et al. Early  
18 term and late preterm birth are associated with poorer school  
19 performance at age 5 years: a cohort study. *Archives of disease in*  
20 *childhood. Fetal and neonatal edition* 2012;**97**(3):F167-173 doi:  
21 10.1136/archdischild-2011-300888published Online First.  
22  
23 16 Chan E, Quigley MA. School performance at age 7 years in late preterm and  
24 early term birth: a cohort study. *Arch Dis Child Fetal Neonatal Ed*  
25 2014;**99**(6):F451-F457 doi:  
26 10.1136/archdischild-2014-306124published Online First.  
27  
28 17 Reddy UM, Bettegowda VR, Dias T, Yamada-Kushnir T, Ko CW, Willinger M.  
29 Term pregnancy: a period of heterogeneous risk for infant mortality.  
30 *Obstetrics and gynecology* 2011;**117**(6):1279-1287 doi:  
31 10.1097/AOG.0b013e3182179e28published Online First.  
32  
33 18 Engle WA. Morbidity and mortality in late preterm and early term  
34 newborns: a continuum. *Clinics in perinatology* 2011;**38**(3):493-516 doi:  
35 10.1016/j.clp.2011.06.009published Online First.  
36  
37 19 Wu CS, Sun Y, Nohr EA, Olsen J. Trends in All-Cause Mortality across  
38 Gestational Age in Days for Children Born at Term. *PloS one*  
39 2015;**10**(12):e0144754 doi: 10.1371/journal.pone.0144754published  
40 Online First.  
41  
42 20 Yang S, Platt RW, Kramer MS. Variation in child cognitive ability by week of  
43 gestation among healthy term births. *American journal of epidemiology*  
44 2010;**171**(4):399-406 doi: 10.1093/aje/kwp413published Online First.  
45  
46 21 Schonhaut L, Armijo I, Perez M. Gestational Age and Developmental Risk in  
47 Moderately and Late Preterm and Early Term Infants. *Pediatrics*  
48 2015;**135**(4):e835-e841 doi: 10.1542/peds.2014-1957published Online  
49 First.  
50  
51 22 Kinney HC. The near-term (late preterm) human brain and risk for  
52 periventricular leukomalacia: a review. *Seminars in perinatology*  
53 2006;**30**(2):81-88 doi: 10.1053/j.semperi.2006.02.006published Online  
54 First.  
55  
56 23 Hensch TK. Critical period plasticity in local cortical circuits. *Nat Rev*  
57 *Neurosci* 2005;**6**(11):877-888 doi: 10.1038/nrn1787published Online  
58  
59  
60

- 1  
2  
3 First: 2005/11/02].  
4  
5 24 Kapellou O, Counsell SJ, Kennea N, Dyet L, Saeed N, Stark J, et al. Abnormal  
6 cortical development after premature birth shown by altered allometric  
7 scaling of brain growth. *PLoS Med* 2006;**3**(8):e265 doi:  
8 10.1371/journal.pmed.0030265published Online First: 2006/07/27].  
9  
10 25 Ip S, Chung M, Raman G, Chew P, Magula N, DeVine D, et al. Breastfeeding  
11 and maternal and infant health outcomes in developed countries. *Evid Rep*  
12 *Technol Assess (Full Rep)* 2007(153):1-186 Online First: 2007/09/04].  
13  
14 26 Quigley MA, Hockley C, Carson C, Kelly Y, Renfrew MJ, Sacker A.  
15 Breastfeeding is associated with improved child cognitive development: a  
16 population-based cohort study. *The Journal of pediatrics*  
17 2012;**160**(1):25-32 doi: 10.1016/j.jpeds.2011.06.035published Online  
18 First.  
19  
20 27 Boucher O, Julvez J, Guxens M, Arranz E, Ibarluzea J, Sanchez de Miguel M, et  
21 al. Association between breastfeeding duration and cognitive  
22 development, autistic traits and ADHD symptoms: a multicenter study in  
23 Spain. *Pediatric research* 2017;**81**(3):434-442 doi:  
24 10.1038/pr.2016.238published Online First.  
25  
26 28 Girard LC, Doyle O, Tremblay RE. Breastfeeding, Cognitive and Noncognitive  
27 Development in Early Childhood: A Population Study. *Pediatrics*  
28 2017;**139**(4) doi: 10.1542/peds.2016-1848published Online First.  
29  
30 29 Koh K. Maternal breastfeeding and children's cognitive development. *Social*  
31 *science & medicine* 2017;**187**:101-108 doi:  
32 10.1016/j.socscimed.2017.06.012published Online First.  
33  
34 30 Räisänen SH, Wu CS, Sun Y, Nohr EA, Olsen J. Trends in All-Cause Mortality  
35 across Gestational Age in Days for Children Born at Term. *PloS one*  
36 2015;**10**(12):e0144754 doi: 10.1371/journal.pone.0144754published  
37 Online First.  
38  
39 31 Crump C, Sundquist K, Winkleby MA, Sundquist J. Early-term birth (37-38  
40 weeks) and mortality in young adulthood. *Epidemiology*  
41 2013;**24**(2):270-276 doi: 10.1097/EDE.0b013e318280da0fpublished  
42 Online First: 2013/01/23].  
43  
44 32 Zhang X, Kramer MS. Variations in mortality and morbidity by gestational  
45 age among infants born at term. *J Pediatr* 2009;**154**(3):358-362, 362.e351  
46 doi: 10.1016/j.jpeds.2008.09.013published Online First: 2008/10/28].  
47  
48 33 Andrade SA, Santos DN, Bastos AC, Pedromonico MR, de Almeida-Filho N,  
49 Barreto ML. [Family environment and child's cognitive development: an  
50 epidemiological approach]. *Revista de saude publica* 2005;**39**(4):606-611  
51 doi: /S0034-89102005000400014published Online First.  
52  
53 34 Sierau S, Dahne V, Brand T, Kurtz V, von Klitzing K, Jungmann T. Effects of  
54 Home Visitation on Maternal Competencies, Family Environment, and  
55 Child Development: a Randomized Controlled Trial. *Prevention science :*  
56 *the official journal of the Society for Prevention Research*  
57 2016;**17**(1):40-51 doi: 10.1007/s11121-015-0573-8published Online  
58  
59  
60



1  
2  
3 First.

- 4 35 Hua J, Duan T, Gu G, Wo D, Zhu Q, Liu JQ, et al. Effects of home and education  
5 environments on children's motor performance in China. *Developmental*  
6 *medicine and child neurology* 2016;**58**(8):868-876 doi:  
7 10.1111/dmcn.13073  
8 published Online First.  
9

10  
11  
12  
13  
14  
15  
16  
17  
18  
19  
20  
21  
22  
23  
24  
25  
26  
27  
28  
29  
30  
31  
32  
33  
34  
35  
36  
37  
38  
39  
40  
41  
42  
43  
44  
45  
46  
47  
48  
49  
50  
51  
52  
53  
54  
55  
56  
57  
58  
59  
60

For peer review only

**Table 1**  
Characteristics by Gestational age (n=1444)

|                                              | Total      | Early term children        |                            | Full term children             | P         |
|----------------------------------------------|------------|----------------------------|----------------------------|--------------------------------|-----------|
|                                              |            | 37wk <sup>a</sup><br>n (%) | 38wk <sup>a</sup><br>n (%) | 39-41 wk <sup>a</sup><br>n (%) |           |
| <b>Children's characteristic<sup>b</sup></b> |            |                            |                            |                                |           |
| Weight for length Z-score                    |            |                            |                            |                                |           |
| Normal                                       | 1156(80.1) | 72(82.8)                   | 162(79.0)                  | 922(80.0)                      | 0.765     |
| Over-weighted                                | 288(19.9)  | 15(17.2)                   | 43(21.0)                   | 230(20.0)                      |           |
| Gender                                       |            |                            |                            |                                |           |
| Male                                         | 722(50.0)  | 51(58.6)                   | 110(53.7)                  | 561(48.7)                      | 0.107     |
| Female                                       | 722(50.0)  | 36(41.4)                   | 95(46.3)                   | 591(51.3)                      |           |
| <b>Maternal characteristic</b>               |            |                            |                            |                                |           |
| Parity, n(%) <sup>b</sup>                    |            |                            |                            |                                |           |
| Nulliparous                                  | 1255(8.9)  | 65(74.7)                   | 181(88.3)                  | 1009(87.6)                     | 0.002**   |
| Multiparous                                  | 189(13.1)  | 22(25.3)                   | 24(11.7)                   | 143(12.4)                      |           |
| Maternal age at delivery                     |            |                            |                            |                                |           |
| ≥35                                          | 49(3.4)    | 3(3.4)                     | 6(2.9)                     | 40(3.5)                        | 0.924     |
| <35                                          | 1395(9.6)  | 84(96.6)                   | 199(97.1)                  | 1112(96.5)                     |           |
| Delivery mode, n(%)                          |            |                            |                            |                                |           |
| Caesarean Section                            | 632(43.7)  | 43(49.4)                   | 101(49.3)                  | 664(57.6)                      | 0.101     |
| Vaginal birth                                | 812(56.2)  | 44(50.6)                   | 104(50.7)                  | 488(42.4)                      |           |
| <b>Socio-economic status</b>                 |            |                            |                            |                                |           |
| City                                         |            |                            |                            |                                |           |
| Wuxi                                         | 480(33.2)  | 25(28.7)                   | 92(44.9)                   | 363(31.5)                      | <0.001*** |
| Taiyuan                                      | 484(33.5)  | 2(2.3)                     | 16(7.8)                    | 466(40.5)                      |           |
| Bingzhou                                     | 480(33.3)  | 60(69.0)                   | 97(47.3)                   | 323(28.0)                      |           |
| Mother's higher education                    |            |                            |                            |                                |           |
| Yes                                          | 827(57.3)  | 53(60.9)                   | 143(69.8)                  | 631(54.8)                      | <0.001*** |
| No                                           | 617(42.7)  | 34(39.1)                   | 62(30.2)                   | 521(45.2)                      |           |
| Father's higher education                    |            |                            |                            |                                |           |
| Yes                                          | 880(60.9)  | 45(51.7)                   | 151(73.7)                  | 684(59.4)                      | <0.001*** |
| No                                           | 564(39.1)  | 42(48.3)                   | 54(26.3)                   | 468(40.6)                      |           |
| Mother's occupation                          |            |                            |                            |                                |           |
| Skilled                                      | 824(57.1)  | 45(51.7)                   | 124(60.5)                  | 655(56.9)                      | 0.365     |
| Non-skilled                                  | 620(42.9)  | 42(48.3)                   | 81(39.5)                   | 497(43.1)                      |           |
| Father's occupation                          |            |                            |                            |                                |           |
| Skilled                                      | 869(60.2)  | 46(52.9)                   | 129(62.9)                  | 694(60.2)                      | 0.275     |
| Non-skilled                                  | 575(39.8)  | 41(47.1)                   | 76(37.1)                   | 458(39.8)                      |           |

<sup>a</sup> Gestational week

<sup>b</sup> Chi-square analysis

\* $P < 0.05$ , \*\*  $P < 0.01$ , \*\*\*  $P < 0.001$

**Table 2**  
Multivariate Linear Regression of Factors Associated With Bayley III Cognitive Development Scores

| Characteristic              | n (%)      | $\beta^a$ (95%CI)        | $\beta^b$ (95%CI)       | $\beta^c$ (95%CI)       | $\beta^d$ (95%CI)       |
|-----------------------------|------------|--------------------------|-------------------------|-------------------------|-------------------------|
| <b>All subjects(n=1444)</b> |            |                          |                         |                         |                         |
| Full term <sup>e</sup>      | 87(6.0)    | Ref                      | Ref                     | Ref                     | Ref                     |
| Born at 37 gestational week | 205(14.2)  | -1.213 (-2.718, 0.291)   | -1.102(-2.604,0.400)    | -0.950(-2.458, 0.557)   | -0.620(-2.124, 0.885)   |
| Born at 38 gestational week | 1152(79.8) | 0.968(-0.058,1.994)      | 0.997(-0.026,2.021)     | 0.963(-0.060, 1.986)    | 0.770(-0.248, 1.789)    |
| <b>Infants(n=844)</b>       |            |                          |                         |                         |                         |
| Full term <sup>e</sup>      | 46(5.5)    | Ref                      | Ref                     | Ref                     | Ref                     |
| Born at 37 gestational week | 123(14.6)  | -2.810 (-4.847,-0.774)** | -2.723(-4.765,-0.680)** | -2.545(-4.590, -0.500)* | -2.257(-4.280, -0.235)* |
| Born at 38 gestational week | 675(80.0)  | 0.450(-0.853,1.768)      | 0.532(-0.780,1.844)     | 0.548(-0.765, 1.861)    | 0.120(-1.180, 1.421)    |
| <b>Toddlers(n=600)</b>      |            |                          |                         |                         |                         |
| Full term <sup>e</sup>      | 41(6.8)    | Ref                      | Ref                     | Ref                     | Ref                     |
| Born at 37 gestational week | 82(13.7)   | 0.623(-1.618,2.863)      | 0.639(-1.567,2.874)     | 0.720(-1.528,2.969)     | 0.935(-1.356,3.225)     |
| Born at 38 gestational week | 477(79.5)  | 1.720(0.075,3.366)*      | 1.671(0.032,3.250)      | 1.449 (-0.140,3.139)    | 1.418(-0.243,3.076)     |

<sup>a</sup> Not adjusted for other variables

<sup>b</sup> Adjusted for children's characteristic (weight for length Z-score , gender ,)

<sup>c</sup> Adjusted for children's and maternal characteristic (delivery mode, parity, maternal age)

<sup>d</sup> Adjusted for children's and maternal characteristic, and socio-economic factors (city, mother's and father's education and occupation)

<sup>e</sup> Children born at 39-41 gestational weeks

\* $p < 0.05$ , \*\* $p < 0.01$

1  
2  
3  
4  
5 **Figure 1. Number of infants and toddlers who completed the questionnaire and tests**

6  
7 **Figure 2. Cognitive composite scores by gestational week in the study are expressed as means and 95% confidence**  
8 **intervals(n=1444)**  
9

10  
11  
12  
13  
14  
15  
16  
17  
18  
19  
20  
21  
22  
23  
24  
25  
26  
27  
28  
29  
30  
31  
32  
33  
34  
35  
36  
37  
38  
39  
40  
41  
42  
43  
44  
45  
46  
47

For peer review only

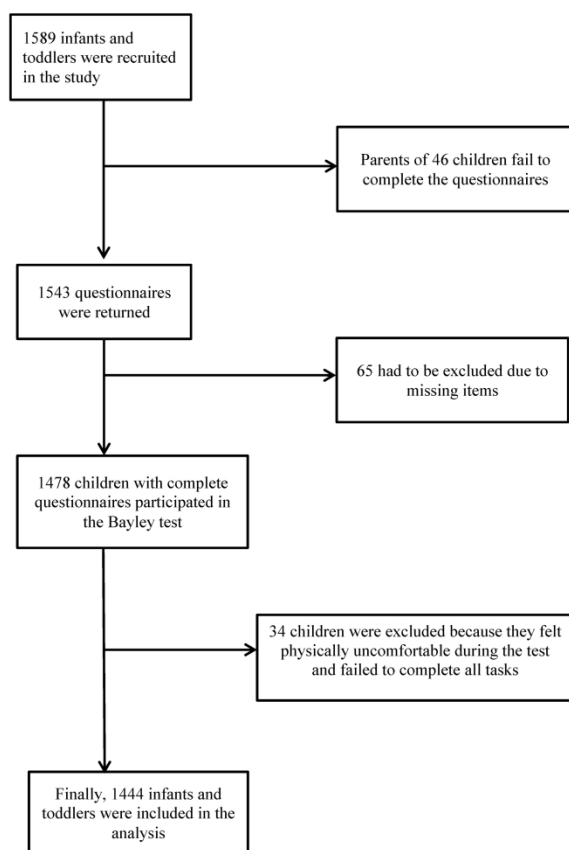

Figure 1. Number of infants and toddlers who completed the questionnaire and tests

279x361mm (300 x 300 DPI)

1  
2  
3  
4  
5  
6  
7  
8  
9  
10  
11  
12  
13  
14  
15  
16  
17  
18  
19  
20  
21  
22  
23  
24  
25  
26  
27  
28  
29  
30  
31  
32  
33  
34  
35  
36  
37  
38  
39  
40  
41  
42  
43  
44  
45  
46  
47  
48  
49  
50  
51  
52  
53  
54  
55  
56  
57  
58  
59  
60

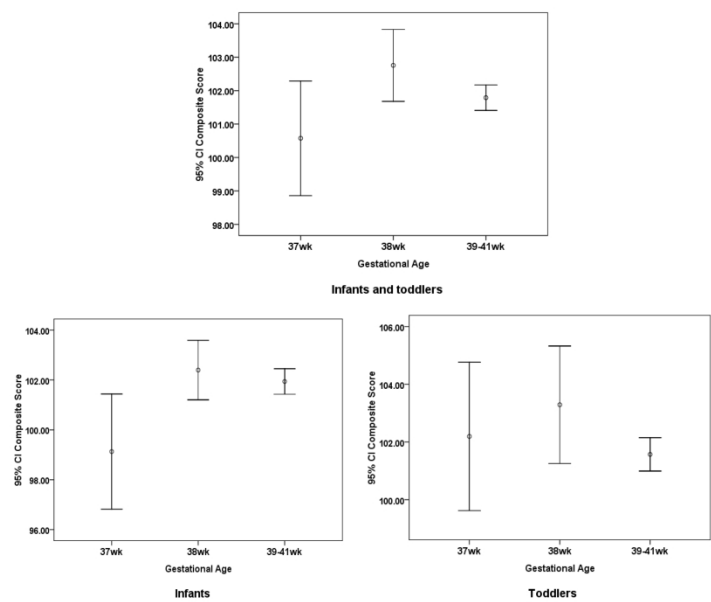

Figure 2. Cognitive composite scores by gestational week in the study are expressed as means and 95% confidence intervals(n=1444)

279x361mm (300 x 300 DPI)

## STROBE Statement—checklist of items that should be included in reports of observational studies

|                              | Item No | Recommendation                                                                                                                                                                                                                                                                                                                                                                                                                                                         | On page      |
|------------------------------|---------|------------------------------------------------------------------------------------------------------------------------------------------------------------------------------------------------------------------------------------------------------------------------------------------------------------------------------------------------------------------------------------------------------------------------------------------------------------------------|--------------|
| <b>Title and abstract</b>    | 1       | (a) Indicate the study's design with a commonly used term in the title or the abstract                                                                                                                                                                                                                                                                                                                                                                                 | 1, 2         |
|                              |         | (b) Provide in the abstract an informative and balanced summary of what was done and what was found                                                                                                                                                                                                                                                                                                                                                                    | 2            |
| <b>Introduction</b>          |         |                                                                                                                                                                                                                                                                                                                                                                                                                                                                        |              |
| Background/rationale         | 2       | Explain the scientific background and rationale for the investigation being reported                                                                                                                                                                                                                                                                                                                                                                                   | 3,4          |
| Objectives                   | 3       | State specific objectives, including any prespecified hypotheses                                                                                                                                                                                                                                                                                                                                                                                                       | 5            |
| <b>Methods</b>               |         |                                                                                                                                                                                                                                                                                                                                                                                                                                                                        |              |
| Study design                 | 4       | Present key elements of study design early in the paper                                                                                                                                                                                                                                                                                                                                                                                                                | 5            |
| Setting                      | 5       | Describe the setting, locations, and relevant dates, including periods of recruitment, exposure, follow-up, and data collection                                                                                                                                                                                                                                                                                                                                        | 5,6,7        |
| Participants                 | 6       | (a) <i>Cohort study</i> —Give the eligibility criteria, and the sources and methods of selection of participants. Describe methods of follow-up<br><i>Case-control study</i> —Give the eligibility criteria, and the sources and methods of case ascertainment and control selection. Give the rationale for the choice of cases and controls<br><i>Cross-sectional study</i> —Give the eligibility criteria, and the sources and methods of selection of participants | 5            |
|                              |         | (b) <i>Cohort study</i> —For matched studies, give matching criteria and number of exposed and unexposed<br><i>Case-control study</i> —For matched studies, give matching criteria and the number of controls per case                                                                                                                                                                                                                                                 |              |
| Variables                    | 7       | Clearly define all outcomes, exposures, predictors, potential confounders, and effect modifiers. Give diagnostic criteria, if applicable                                                                                                                                                                                                                                                                                                                               | 4,5,6        |
| Data sources/<br>measurement | 8*      | For each variable of interest, give sources of data and details of methods of assessment (measurement). Describe comparability of assessment methods if there is more than one group                                                                                                                                                                                                                                                                                   |              |
| Bias                         | 9       | Describe any efforts to address potential sources of bias                                                                                                                                                                                                                                                                                                                                                                                                              | 5,7,8        |
| Study size                   | 10      | Explain how the study size was arrived at                                                                                                                                                                                                                                                                                                                                                                                                                              | 5            |
| Quantitative variables       | 11      | Explain how quantitative variables were handled in the analyses. If applicable, describe which groupings were chosen and why                                                                                                                                                                                                                                                                                                                                           | 6,7          |
| Statistical methods          | 12      | (a) Describe all statistical methods, including those used to control for confounding                                                                                                                                                                                                                                                                                                                                                                                  | 7,8          |
|                              |         | (b) Describe any methods used to examine subgroups and interactions                                                                                                                                                                                                                                                                                                                                                                                                    | 7,8          |
|                              |         | (c) Explain how missing data were addressed                                                                                                                                                                                                                                                                                                                                                                                                                            | 5, Figure 1. |
|                              |         | (d) <i>Cohort study</i> —If applicable, explain how loss to follow-up was addressed<br><i>Case-control study</i> —If applicable, explain how matching of cases and controls was addressed<br><i>Cross-sectional study</i> —If applicable, describe analytical methods taking account of sampling strategy                                                                                                                                                              | 7,8          |
|                              |         | (e) Describe any sensitivity analyses                                                                                                                                                                                                                                                                                                                                                                                                                                  |              |

Continued on next page

| <b>Results</b>           |     |                                                                                                                                                                                                                                                                                                                                                                                                               | <b>On page</b>                         |
|--------------------------|-----|---------------------------------------------------------------------------------------------------------------------------------------------------------------------------------------------------------------------------------------------------------------------------------------------------------------------------------------------------------------------------------------------------------------|----------------------------------------|
| Participants             | 13* | (a) Report numbers of individuals at each stage of study—eg numbers potentially eligible, examined for eligibility, confirmed eligible, included in the study, completing follow-up, and analysed<br>(b) Give reasons for non-participation at each stage<br>(c) Consider use of a flow diagram                                                                                                               | 8<br><br>Figure 1                      |
| Descriptive data         | 14* | (a) Give characteristics of study participants (eg demographic, clinical, social) and information on exposures and potential confounders<br>(b) Indicate number of participants with missing data for each variable of interest<br>(c) <i>Cohort study</i> —Summarise follow-up time (eg, average and total amount)                                                                                           | 8<br><br>5, Figure 1.                  |
| Outcome data             | 15* | <i>Cohort study</i> —Report numbers of outcome events or summary measures over time<br><i>Case-control study</i> —Report numbers in each exposure category, or summary measures of exposure<br><i>Cross-sectional study</i> —Report numbers of outcome events or summary measures                                                                                                                             | <br><br>Table I~IV                     |
| Main results             | 16  | (a) Give unadjusted estimates and, if applicable, confounder-adjusted estimates and their precision (eg, 95% confidence interval). Make clear which confounders were adjusted for and why they were included<br>(b) Report category boundaries when continuous variables were categorized<br>(c) If relevant, consider translating estimates of relative risk into absolute risk for a meaningful time period | 9,10<br><br>9,10<br><br>Not applicable |
| Other analyses           | 17  | Report other analyses done—eg analyses of subgroups and interactions, and sensitivity analyses                                                                                                                                                                                                                                                                                                                | 9,10                                   |
| <b>Discussion</b>        |     |                                                                                                                                                                                                                                                                                                                                                                                                               |                                        |
| Key results              | 18  | Summarise key results with reference to study objectives                                                                                                                                                                                                                                                                                                                                                      | 10                                     |
| Limitations              | 19  | Discuss limitations of the study, taking into account sources of potential bias or imprecision. Discuss both direction and magnitude of any potential bias                                                                                                                                                                                                                                                    | 14                                     |
| Interpretation           | 20  | Give a cautious overall interpretation of results considering objectives, limitations, multiplicity of analyses, results from similar studies, and other relevant evidence                                                                                                                                                                                                                                    | 11,12                                  |
| Generalisability         | 21  | Discuss the generalisability (external validity) of the study results                                                                                                                                                                                                                                                                                                                                         | 10,11,12,13                            |
| <b>Other information</b> |     |                                                                                                                                                                                                                                                                                                                                                                                                               |                                        |
| Funding                  | 22  | Give the source of funding and the role of the funders for the present study and, if applicable, for the original study on which the present article is based                                                                                                                                                                                                                                                 | 14                                     |

\*Give information separately for cases and controls in case-control studies and, if applicable, for exposed and unexposed groups in cohort and cross-sectional studies.

**Note:** An Explanation and Elaboration article discusses each checklist item and gives methodological background and published examples of transparent reporting. The STROBE checklist is best used in conjunction with this article (freely available on the Web sites of PLoS Medicine at <http://www.plosmedicine.org/>, Annals of Internal Medicine at <http://www.annals.org/>, and Epidemiology at <http://www.epidem.com/>). Information on the STROBE Initiative is available at [www.strobe-statement.org](http://www.strobe-statement.org).



# BMJ Open

## Differentiating the cognitive development of early term births in infants and toddlers: a cross-sectional study in China

|                                 |                                                                                                                                                                                                                                                                                                                                                                                                                                                                                                                                                                                                                                                                                                                                                        |
|---------------------------------|--------------------------------------------------------------------------------------------------------------------------------------------------------------------------------------------------------------------------------------------------------------------------------------------------------------------------------------------------------------------------------------------------------------------------------------------------------------------------------------------------------------------------------------------------------------------------------------------------------------------------------------------------------------------------------------------------------------------------------------------------------|
| Journal:                        | <i>BMJ Open</i>                                                                                                                                                                                                                                                                                                                                                                                                                                                                                                                                                                                                                                                                                                                                        |
| Manuscript ID                   | bmjopen-2018-025275.R2                                                                                                                                                                                                                                                                                                                                                                                                                                                                                                                                                                                                                                                                                                                                 |
| Article Type:                   | Research                                                                                                                                                                                                                                                                                                                                                                                                                                                                                                                                                                                                                                                                                                                                               |
| Date Submitted by the Author:   | 22-Feb-2019                                                                                                                                                                                                                                                                                                                                                                                                                                                                                                                                                                                                                                                                                                                                            |
| Complete List of Authors:       | Hua, Jing; Shanghai First Maternity and Infant Hospital, Tongji University School of medicine,<br>Sun, Jie; Shanghai First Maternity and Infant Hospital, Tongji University School of medicine<br>Cao, Zhijuan; Shanghai First Maternity and Infant Hospital, Tongji University School of medicine<br>Dai, Xiaotian; Shanghai First Maternity and Infant Hospital, Tongji University School of medicine<br>Lin, Senran; Shanghai First Maternity and Infant Hospital, Tongji University School of medicine<br>Guo, Jialin; Shanghai First Maternity and Infant Hospital, Tongji University School of medicine<br>Gu, Guixiong; Pediatrics Research Institution of Soochow University<br>Du, Wenchong; Nottingham Trent University, Psychology Division |
| <b>Primary Subject Heading</b>: | Epidemiology                                                                                                                                                                                                                                                                                                                                                                                                                                                                                                                                                                                                                                                                                                                                           |
| Secondary Subject Heading:      | Paediatrics, Public health                                                                                                                                                                                                                                                                                                                                                                                                                                                                                                                                                                                                                                                                                                                             |
| Keywords:                       | Cognitive development, early term, infants and toddlers, China                                                                                                                                                                                                                                                                                                                                                                                                                                                                                                                                                                                                                                                                                         |
|                                 |                                                                                                                                                                                                                                                                                                                                                                                                                                                                                                                                                                                                                                                                                                                                                        |

SCHOLARONE™  
Manuscripts

1  
2  
3  
4 **Differentiating the cognitive development of early term births in**  
5  
6 **infants and toddlers: a cross-sectional study in China**  
7  
8  
9

10  
11 Jing Hua<sup>1†\*</sup>, Jie Sun<sup>1†</sup>, Zhijuan Cao<sup>1†</sup>, Xiaotian Dai<sup>1</sup>, Senran Lin<sup>1</sup>, Jialin Guo<sup>1†</sup>,  
12 Guixiong Gu<sup>2\*</sup>, Wenchong Du<sup>3</sup>  
13

14 \*Co-Corresponding author:  
15

16  
17 Jing Hua, Shanghai First Maternity and Infant Hospital, Tongji University School of  
18 Medicine P.O. 2699 Gaoke Road, 200042 Shanghai, China, Fax: 086-021-20261428, Email:  
19 szhuaj@hotmail.com, Jing Hua. Guixiong Gu, Pediatrics Research Institution of Soochow  
20 University; P.O. 303 Jingde Road, 215003 Suzhou, China E-mail Phone: 086-0512-80696526  
21 Email: szgqx000@163.com.  
22  
23  
24  
25  
26  
27

28 <sup>1</sup>Shanghai First Maternity and Infant Hospital, Tongji University School of Medicine,  
29 Shanghai, China;  
30

31 <sup>2</sup>Pediatrics Research Institution of Soochow University, Suzhou, China;  
32

33 <sup>3</sup>Psychology Division, Nottingham Trent University, Chaucer Building 4013,  
34 Nottingham, UK  
35  
36  
37  
38

39 †These authors contributed equally to this work.  
40  
41  
42  
43  
44  
45  
46  
47  
48  
49  
50  
51  
52  
53  
54  
55  
56  
57  
58  
59  
60

## ABSTRACT

**Objectives:** This study aimed to explore the cognitive development of low-risk children during early childhood for early term births at 37 and 38 weeks of gestation compared to full term births at 39-41 weeks of gestation.

**Setting and Participants:** We conducted a cross-sectional study in Shanghai, one of the largest cities in China. A total of 1444 children from singleton pregnancies born at term gestation were included in the study.

**Measures:** The cognitive outcomes of the subjects were measured using the cognitive subtest of Bayley Scales of Infant and toddler Development-third Edition (BSID-III) across three cities in China. We analyzed the association between gestational age and cognitive development during infancy and toddler stages using multivariate linear modeling.

**Results:** The cognitive development scores for infants born at 37 gestational weeks were significantly lower than those born at 39 to 41 gestational weeks ( $\beta=-2.257$ , 95%CI:-4.280 to -0.235;  $p<0.05$ ) after adjusting for children's and maternal characteristics, as well as socio-economic factors. However, there were no significant differences in cognitive ability between infants born at 38 gestational weeks compared to their full-term counterparts ( $p>0.05$ ). Moreover, these effects were not found in toddlers (between 17 and 48 months of age) after adjusting for the possible confounders ( $p>0.05$ ).

**Conclusions:** Infants born at 37 weeks of gestation exhibited weaker cognitive ability compared with those born at 39-41 weeks of gestation. Our findings provide evidences for the close monitoring of potential developmental problems in early term children, especially those born at 37 gestational weeks.

**Keywords:** Cognitive development; early term, infants and toddlers; China

#### Strengths and limitations of this study

- Our findings extend the limited available literature on the relationship of gestational age with cognitive developmental scores. Infants born at 37 weeks of gestation had significantly weaker cognitive ability compared with their full-term counterparts.
- Our finding provided evidences for the close monitoring of potential developmental problems in early term children, especially in those born at 37 gestational weeks.
- The sample size was relatively small in our study (n=1444), and the results were not consistent across different age groups. Further studies are needed in order to verify this result.
- Although we examined a number of potential confounders, several other confounding factors were not measured. For instance, the detailed maternal and obstetric factors for early-term deliveries were not available in our study.

## INTRODUCTION

It had been previously believed that children born between 37 and 41 weeks of gestational age share similar health outcomes, therefore including them in the same low-risk group.<sup>1</sup> In 2012, the American Academy of Pediatrics recommended that births occurring between 37 weeks 0 days and 38 weeks 6 days be defined as early term, while those from 39 weeks 0 days through to 40 weeks 6 days as full term.<sup>2</sup> Approximately 27.6% of all births in the United States are early term,<sup>3,4</sup> far exceeding the number of preterm births.<sup>4,5</sup> Many studies have reported that early-term births are associated with higher neonatal morbidity and higher probability of NICU admission compared with their full term counterparts (> 38 gestational weeks).<sup>6</sup> Early term children also have increased susceptibility to various metabolic, neurologic and respiratory diseases.<sup>7-9</sup>

Recently, research into the effect of gestational age on developmental outcomes has directed attention to the investigation of early term infants.<sup>10</sup> There have been increasing reports which show that early term births resulted in worsened cognitive and academic outcomes compared to those born at 39 weeks or later.<sup>1,10-13</sup> A systematic review showed that full-term cohorts performed 3% of a standard deviation higher in cognitive outcome than early term cohorts<sup>10</sup>. The gestation period between 37-40 weeks was associated with neuromotor and cognitive development in 9- to 15-week-old and 12-month-old infants.<sup>13,14</sup> Early term birth was associated with an increased risk of worsened academic achievements at ages 5 to 7 years.<sup>15,16</sup>

1  
2  
3  
4 However, on the basis of recent research,<sup>13,17-19</sup> the exact boundary which  
5  
6 separates early term and full term gestation periods should be carefully examined  
7  
8 because of its implications for neonatal and developmental outcomes. The highest risk  
9  
10 of mortality was observed for children born at 37 gestational weeks, but not for those  
11  
12 born at 38 gestational weeks.<sup>19</sup> Furthermore, a prospective cohort study in Belarus  
13  
14 showed that children born at 37 gestational weeks had a significantly lower full-scale  
15  
16 intelligence quotient (IQ) score compared with those born at 39-41 weeks, however,  
17  
18 this difference was not observed in children born at 38 gestational weeks.<sup>20</sup> Moreover,  
19  
20 in a large sample of healthy infants, there was a significant difference in the mental  
21  
22 development index (MDI) between infants born at 37 and 38 gestational weeks, but  
23  
24 almost no difference between those born at 38 and 39 gestational weeks.<sup>13</sup> However,  
25  
26 the degree to which earlier gestational age confers risk among infants born at term  
27  
28 from 37 to 41 weeks of gestation remains unclear.<sup>12,20,21</sup>  
29  
30  
31  
32  
33  
34  
35  
36  
37

38 In this study, we used a cross-sectional study design to examine a sample of urban  
39  
40 Chinese singleton pregnancies born at term gestation. We hypothesized that early  
41  
42 term births may result in significant cognitive delay, especially those born at 37  
43  
44 gestational weeks. We further examined the differences in cognitive ability in both  
45  
46 infants and toddlers across various term births in order to determine the true  
47  
48 underlying risk across different gestational weeks. The aim of the study is: 1) to  
49  
50 differentiate the cognitive development of children born at 37, 38 and 39-41  
51  
52 gestational weeks; 2) to independently analyze the effects of gestational weeks on  
53  
54 cognitive development in both short-term (infants) and long term (toddlers), in order  
55  
56  
57  
58  
59  
60

1  
2  
3  
4 to provide evidences for the close monitoring of potential developmental problems in  
5  
6 early term children.  
7  
8  
9

## 10 11 **MATERIALS AND METHODS**

### 12 13 14 **Participants**

15  
16 We conducted a cross-sectional study in mainland China from May to December of  
17  
18 2011. We used a stratified sampling technique, with area, gender, and months of age  
19  
20 as stratification variables. A total of 1589 children aged between 16 days to 42  
21  
22 months were selected from 3 children's healthcare institutions in medium-sized cities  
23  
24 distributed across 3 geographic regions: North China, Middle China, and East China.  
25  
26 The selection of age bands was based on the categories proposed in the Bayley-III  
27  
28 technical manual (totaling 48 age bands). The inclusion criteria for infants and  
29  
30 toddlers included: singleton and born at term, born without significant medical  
31  
32 complications, did not have a history of medical complications, and not currently  
33  
34 diagnosed with or receiving treatment for mental, physical or behavioral difficulties.  
35  
36 The exclusion criteria included: confounding conditions or developmental risk factors  
37  
38 such as abnormal hearing or vision, taking medications that could affect performance  
39  
40 or admission to hospital at the time of testing, and any other problems involving  
41  
42 nutrition, sleep or infections during the clinical visit. Of the 1589 eligible children  
43  
44 who were recruited, a total of 1444 children were included for the study (Figure 1).  
45  
46  
47  
48  
49  
50  
51  
52  
53  
54  
55  
56 All information was kept confidential and was only accessible to the researchers.  
57  
58  
59  
60

## **Patient and Public Involvement**

None of the patients were involved in the research design or development of the research question and outcome measures. They were also not involved in the recruitment and conduct of the study. The results of the study would be disseminated to study participants by means of the participating children's healthcare institutions.

## **Measurements**

The Bayley Scale of Infant and Toddler Development, Third Edition (Bayley-III) is an individually administered scale that assesses five key developmental domains in children between 1-42 months of age: cognition, language (receptive and expressive communication), motor (gross and fine), social-emotional and adaptive behavior. The first three domains are assessed through direct observation of the child in test situations, while the last two are assessed through questionnaires to be completed by the main caregiver. We first obtained formal permission to translate and validate the Bayley-III scale from the American publishers of this tool (Pearson). We then started developing a Chinese version of Bayley-III, following the recommendations of Hambleton and Patsula (1999), and Herdman, Fox-Rushby and Badia (1998) for the translation and adaptation of a test, taking into consideration conceptual, item, semantic, operational, measurement and functional equivalences. Each step of this process was presented in the results section. The Chinese version of the BSID-III was translated by a native Chinese speaker and independent professional who adapted the items into context and culture. Subsequently, the final Chinese version of the



1  
2  
3  
4 BSID-III was retranslated into English by two native English speakers who were  
5  
6 blinded to the original version. The test manual and materials will utilize the same  
7  
8 trademark, logo, and design as used on the English version of the test. We have  
9  
10 explored the reliability and validity of the Bayley-III cognitive scale in a parallel  
11  
12 study, which showed a good to excellent reliability of the Bayley-III cognitive scale  
13  
14 (e.g. the coefficients of inter-item consistency were more than 0.75; the test-retest and  
15  
16 inter-rater reliability of the scale were more than 0.90). The content, construct and  
17  
18 known-group validity of Bayley-III cognitive scale were also sufficient in the parallel  
19  
20 study. Additionally, gestational age is measured as the age of a pregnancy which was  
21  
22 taken from the woman's last menstrual period, records of which were obtained from  
23  
24 the hospital's medical record registration system following confirmation by  
25  
26 ultrasound exam.  
27  
28  
29  
30  
31  
32  
33  
34  
35  
36  
37

### 38 **Procedure**

39  
40 The survey was conducted during the well-child visits in the participating children's  
41  
42 healthcare institutions. Nurses who took part in the check in and physical examination  
43  
44 (weight, height and head circumference) were responsible for handing out the  
45  
46 questionnaires to the children's parents. Six developmental pediatricians were trained  
47  
48 to administrate the Bayley-III cognitive scale. The testers had become familiar with  
49  
50 the test guidance by carrying out a series of practice assessments on several children  
51  
52 who did not take part in the study. Any problems associated with test administration  
53  
54 during the training period were clarified by the administrator of this study prior to the  
55  
56  
57  
58  
59  
60

1  
2  
3  
4 test. The test environment was quiet and non-interfering, and all infants and toddlers  
5  
6 needed to be calm, stable and satiated. The tester encouraged the infants and toddlers  
7  
8 to display their highest level of ability during the test. A trained pediatrician took the  
9  
10 responsibility for conducting the entire test for each child in order to maximize both  
11  
12 interpretation validity and assessment reliability.  
13  
14  
15

### 16 17 18 19 **Statistical analysis**

20  
21 All analyses were performed using SPSS 17.0 software. Chi-square analyses were  
22  
23 used for comparing children and maternal characteristics between those born at 37 or  
24  
25 38 gestational weeks and those born at full term (39-41 gestational weeks). Means of  
26  
27 cognitive scores among different gestational weeks was evaluated using one-way  
28  
29 ANOVA and post-hoc comparison. Multivariate linear regression was used to test the  
30  
31 relationship between gestational age and cognitive developmental scores, taking into  
32  
33 account potential confounding variables including gender, weight-for-length Z-scores,  
34  
35 parity, mother's age, delivery mode, parents' education and occupation. Social  
36  
37 economic factors were not included because they were highly correlated with parental  
38  
39 occupation.  $p < 0.05$  was considered statistically significant.  
40  
41  
42  
43  
44  
45  
46  
47  
48  
49

## 50 **RESULTS**

51  
52 Of the 1444 children included in the study, 844 were infants aged between 16 days  
53  
54 after birth to 16 months (58.4%), and 600 were toddlers aged between 17 months to  
55  
56 48 months (41.6%). Among these subjects, 1152 (79.8%) were full term births, 87  
57  
58  
59  
60

1  
2  
3  
4 (6.02%) were born at 37 gestational weeks, and 205 (14.2%) were born at 38  
5  
6 gestational weeks. The mean cognitive composite score was 101.9, with a standard  
7  
8 deviation of 6.9. The parity, the family's city of residence, and parents' education  
9  
10 were significantly different among those born at 37, 38 and 39-41 gestational ages  
11  
12 (Table 1).  
13  
14  
15

16  
17 The cognitive composite score was expressed as means and 95% confidence  
18  
19 interval (Figure 2). In infants aged between 16 days to 16 months, the cognitive  
20  
21 composite score for those born at 37 gestational weeks of age was significantly lower  
22  
23 than those born at 39-41 gestation weeks ( $p < 0.05$ ).  
24  
25  
26

27 Using multivariate linear regression model, cognitive composite scores for children  
28  
29 born at 37 weeks decreased 2.810 (95%CI:-4.847 to -0.774) when compared with  
30  
31 those born at 39-41 gestational weeks during infancy with statistical significance  
32  
33 ( $p = 0.007$ ) without adjusting for ( $\beta = -2.810$ , . The effects remained when adjusting for  
34  
35 the children's characteristics only ( $\beta = -2.723$ , 95%CI:-4.765 to -0.680;  $p = 0.009$ ), or in  
36  
37 combination with maternal characteristics ( $\beta = -2.545$ , 95%CI:-4.590 to -0.500;  
38  
39  $p = 0.015$ ), as well as socio-economic factors ( $\beta = -2.257$ , 95%CI:-4.280 to -0.235;  
40  
41  $p = 0.029$ ; Table 2).  
42  
43  
44  
45  
46  
47

48 However, in toddlers aged between 17 months to 48 months (Table 2), there were  
49  
50 almost no statistically significant associations between those born at 37 or 38  
51  
52 gestational weeks to those born in full term (39-41 gestational weeks). The only  
53  
54 difference was a slightly higher composite cognitive score ( $\beta = 1.723$ , 95%CI: 0.075 to  
55  
56 3.366;  $p = 0.041$ ) in toddlers born at 38 gestational weeks compared to those born in full  
57  
58  
59  
60

1  
2  
3  
4 term, when not adjusting for any other variables. The effects disappeared when  
5  
6 adjusting the other variables.  
7  
8  
9

## 10 11 **DISCUSSION**

12  
13  
14 To our knowledge, our paper is the first in China and one of few studies in the world  
15  
16 to report on the short- and long-term neurobehavioral outcomes of early term children.  
17  
18 A weaker cognitive ability was observed in infants born at 37 gestational weeks  
19  
20 compared with their full-term (born at 39-41 gestational weeks) counterparts. Our  
21  
22 findings extend the limited available literature on the relationship of gestational age to  
23  
24 cognitive developmental scores.  
25  
26  
27  
28  
29

30 In our study, we found that the effect of early term birth (37 gestational weeks)  
31  
32 persisted in infancy even when a broad range of confounders including parental  
33  
34 characteristics were considered. The mechanisms underlying the effect of early term  
35  
36 birth on cognitive development scores may be multifactorial. The intrauterine and  
37  
38 extrauterine environments differ dramatically in relationship to maternal and placental  
39  
40 hormones, which may play an important role in brain development.<sup>13</sup> The intrauterine  
41  
42 environment supports typical brain development, which is more likely to be disrupted  
43  
44 in children born during early term gestation.<sup>12</sup> Moreover, brain development occurs in  
45  
46 a very specific order and time frame.<sup>10</sup> The volume of total grey matter increases by  
47  
48 approximately 1.4% per week from 29 to 41 weeks of gestation, while the volume of  
49  
50 white matter sees a fivefold increase between 35 and 41 weeks of gestation.<sup>15,22</sup>  
51  
52  
53  
54  
55  
56  
57  
58 Early term births may cause disruptions at specific times during the development of  
59  
60

1  
2  
3  
4 the brain's neural connections for specific cognitive areas.<sup>23</sup> Even at 38 weeks of  
5  
6 gestation, the brain is still only 90% of full-term weight.<sup>24</sup> However, there have been  
7  
8  
9 no studies about the subtle differences in brain development between infants born at  
10  
11 37 and 38 gestational weeks. Future research is necessary to investigate the  
12  
13 mechanisms behind this phenomenon.  
14  
15

16  
17 Additionally, children who were born early term may have a shorter breastfeeding  
18  
19 duration compared with children born at full term.<sup>15,25-27</sup> The breastfeeding duration  
20  
21 was positively associated with children's cognitive development,<sup>28,29</sup> possibly due to  
22  
23 the abundance of cognition-related nutrients found in breast milk such as  
24  
25 docosahexaenoic (DHA) and arachidonic acid. Shorter breastfeeding duration may  
26  
27 result in an increase in morbidity such as asthma and the number of hospital  
28  
29 admissions, which was associated with a delay in achieving early developmental  
30  
31 milestones that may have an effect educational achievements.<sup>15</sup>  
32  
33  
34  
35  
36

37  
38 This finding further supports the results from previous related research. For  
39  
40 example, the highest mortality rate was observed among children born at 37 weeks of  
41  
42 gestation, which necessitates caution in inducing labor for early term pregnancies (37  
43  
44 weeks of gestation). When gestational age in days was classified as gestational weeks,  
45  
46 the mortality for children born at 37 weeks of gestation was higher compared to  
47  
48 later-term births,<sup>17,30-32</sup> however, children born at 38 weeks of gestation was not  
49  
50 associated with an increased mortality. Thus, the true underlying problems for  
51  
52 children born in week 37, remains unknown. Our findings, combined with these  
53  
54 studies, also provide the evidences for the categorization of early term births. Close  
55  
56  
57  
58  
59  
60

1  
2  
3  
4 monitoring for any signs of developmental problems is of the utmost importance in  
5  
6 children born at 37 gestational weeks.  
7  
8

9 Interestingly, in our study, the problems associated with early term birth was not  
10 found in toddlers (aged between 17 months to 48 months), possibly due to the fact  
11 that the family parenting environment had a greater impact on long-term outcomes,  
12 which 'weakened' the association between early term birth and cognitive  
13 development. A previous study showed that the quality of stimulation in the family  
14 environment is crucial for the child's cognitive development.<sup>33</sup> A randomized control  
15 trial suggested that intervention on family environment and maternal competency has  
16 positive effects on child development (including cognitive and motor development).<sup>34</sup>  
17  
18 In China, the effects of home and educational environments can promote the motor  
19 performance in preschoolers.<sup>35</sup>  
20  
21  
22  
23  
24  
25  
26  
27  
28  
29  
30  
31  
32  
33  
34  
35  
36  
37

## 38 CONCLUSIONS

39  
40 Our study showed that the cognitive development scores for children born at 37  
41 gestational weeks were significantly lower than those born at 39 to 41 gestation weeks.  
42  
43 Therefore, healthcare professionals need to be more aware of the potential short-term  
44 and long-term care requirements of early term children. Close monitoring for any  
45 signs of health and developmental problems in early term children born at 37  
46 gestational weeks can allow the early detection and timely treatment of borderline  
47 abnormalities, as well as prevent any potential negative health outcomes. However,  
48 because the sample size of our study was relatively small, and the results were not  
49  
50  
51  
52  
53  
54  
55  
56  
57  
58  
59  
60

1  
2  
3  
4 consistent across different age groups. Only early cognitive development was affected  
5  
6 by early term birth, which may provide limited evidence for public health. Further  
7  
8 studies are needed in order to verify these results.  
9

10  
11 Moreover, although we examined a number of potential confounders, several other  
12  
13 confounding factors were not measured. For instance, fetal distress, hypertensive  
14  
15 disorder complicating pregnancy, and gestational diabetes mellitus which may affect  
16  
17 offspring's cognitive development according to the literature. These maternal and  
18  
19 obstetric factors for early-term deliveries were not available in our study, and these  
20  
21 factors will be considered in our further research. Further, the cognitive  
22  
23 developmental scores of children in our study are all normal (above 80 points),  
24  
25 possibly because we selected singletons born at term birth who were mostly at  
26  
27 low-risk.  
28  
29  
30  
31  
32  
33  
34  
35  
36  
37

38 **Acknowledgements** The authors wish to thank all researchers and medical practitioners  
39  
40 who participated in this study for the distribution and collection of the questionnaires,  
41  
42 as well as administrating the cognitive scale testing for children. We also thank Bing  
43  
44 Wang for acquiring the Research Translation License Agreement of the Bayley-3  
45  
46 cognitive scale.  
47  
48  
49  
50  
51  
52

53 **Contributors** JH, JS, ZC and JG contributed to the study design and drafting of the  
54  
55 paper. XD and SL were responsible for literature search, quality control of the testing,  
56  
57 and data collection. WD and GG revised the paper and approved the finalized  
58  
59  
60

manuscript submission.

**Founding** National Natural Science Foundation of China under Grant (81673179, 81402687), the Shengkang Hospital Development Center under Grant(SHDC12016239), the Science and Technology Commission of Shanghai Municipality under Grant (18140903100)

**Competing interests** None declared.

**Ethics approval** The study received ethical approval from the Local Committee of Soochow University, China (201101). Written informed consent was obtained from the parents or legal guardians of the participants prior to the questionnaire survey. Oral parental consents were obtained prior to investigation and tests.

**Provenance and peer review** Not commissioned; externally peer reviewed.

**Data sharing statement** Data sets generated and/or analysed during the current study available from the corresponding author on reasonable request.

**Open Access** This is an Open Access article distributed in accordance with the Creative Commons Attribution Non Commercial (CC BY-NC 4.0) license, which permits others to distribute, remix, adapt, build upon this work non-commercially, and license their derivative works on different terms, provided the original work is properly cited and the use is non-commercial. See: <http://creativecommons.org/licenses/by-nc/4.0/>



1  
2  
3  
4 **Conflict of interest statement**

5 None declared.  
6  
7  
8  
9  
10  
11  
12  
13  
14  
15  
16  
17  
18  
19  
20  
21  
22  
23  
24  
25  
26  
27  
28  
29  
30  
31  
32  
33  
34  
35  
36  
37  
38  
39  
40  
41  
42  
43  
44  
45  
46  
47  
48  
49  
50  
51  
52  
53  
54  
55  
56  
57  
58  
59  
60

For peer review only

## References

- 1 Sengupta S, Carrion V, Shelton J, Wynn RJ, Ryan RM, Singhal K, et al. Adverse Neonatal Outcomes Associated With Early-Term Birth. *JAMA Pediatrics* 2013;**167**(11):1053 doi: 10.1001/jamapediatrics.2013.2581published Online First.
- 2 Spong CY. Defining “Term” Pregnancy. *Jama* 2013;**309**(23):2445 doi: 10.1001/jama.2013.6235published Online First.
- 3 Martin JA, Hamilton BE, Sutton PD, Ventura SJ, Mathews TJ, Kirmeyer S, et al. Births: final data for 2007. *Natl Vital Stat Rep* 2010;**58**(24):1-85 Online First: 2011/01/25].
- 4 Martin JA, Hamilton BE, Ventura SJ, Osterman MJ, Kirmeyer S, Mathews TJ, et al. Births: final data for 2009. *Natl Vital Stat Rep* 2011;**60**(1):1-70 Online First: 2012/06/08].
- 5 Mally PV, Agathis NT, Bailey SM. Early term infants are at increased risk of requiring neonatal intensive care. *World journal of pediatrics : WJP* 2016;**12**(1):76-81 doi: 10.1007/s12519-015-0049-8published Online First.
- 6 Craighead DV. Early term birth: understanding the health risks to infants. *Nursing for women's health* 2012;**16**(2):136-144; quiz 145 doi: 10.1111/j.1751-486X.2012.01719.xpublished Online First.
- 7 Schonhaut L, Armijo I, Perez M. Gestational age and developmental risk in moderately and late preterm and early term infants. *Pediatrics* 2015;**135**(4):e835-841 doi: 10.1542/peds.2014-1957published Online First.
- 8 Rabie NZ, Bird TM, Magann EF, Hall RW, McKelvey SS. ADHD and developmental speech/language disorders in late preterm, early term and term infants. *Journal of perinatology : official journal of the California Perinatal Association* 2015;**35**(8):660-664 doi: 10.1038/jp.2015.28published Online First.
- 9 Goyal NK, Attanasio LB, Kozhimannil KB. Hospital care and early breastfeeding outcomes among late preterm, early-term, and term infants. *Birth* 2014;**41**(4):330-338 doi: 10.1111/birt.12135published Online First.
- 10 Chan E, Leong P, Malouf R, Quigley MA. Long-term cognitive and school outcomes of late-preterm and early-term births: a systematic review. *Child: Care, Health and Development* 2016;**42**(3):297-312 doi: 10.1111/cch.12320published Online First.
- 11 Richards JL, Drews-Botsch C, Sales JM, Flanders WD, Kramer MR. Describing the Shape of the Relationship Between Gestational Age at Birth and Cognitive Development in a Nationally Representative U.S. Birth Cohort. *Paediatric and Perinatal Epidemiology* 2016;**30**(6):571-582 doi: 10.1111/ppe.12319published Online First.
- 12 Noble KG, Fifer WP, Rauh VA, Nomura Y, Andrews HF. Academic Achievement Varies With Gestational Age Among Children Born at Term. *Pediatrics* 2012;**130**(2):e257-e264 doi: 10.1542/peds.2011-2157published Online First.

- 1  
2  
3 13 Rose O, Blanco E, Martinez SM, Sim EK, Castillo M, Lozoff B, et al.  
4     Developmental scores at 1 year with increasing gestational age, 37-41 weeks.  
5     *Pediatrics* 2013;**131**(5):e1475-1481 doi: 10.1542/peds.2012-3215published  
6     Online First.
- 7  
8 14 van Batenburg-Eddes T, de Groot L, Arends L, de Vries A, Moll HA, Steegers  
9     EA, et al. Does gestational duration within the normal range predict infant  
10    neuromotor development? *Early human development* 2008;**84**(10):659-665 doi:  
11    10.1016/j.earlhumdev.2008.04.007published Online First.
- 12  
13 15 Quigley MA, Poulsen G, Boyle E, Wolke D, Field D, Alfievic Z, et al. Early  
14    term and late preterm birth are associated with poorer school performance at  
15    age 5 years: a cohort study. *Archives of disease in childhood. Fetal and*  
16    *neonatal edition* 2012;**97**(3):F167-173 doi:  
17    10.1136/archdischild-2011-300888published Online First.
- 18  
19 16 Chan E, Quigley MA. School performance at age 7 years in late preterm and  
20    early term birth: a cohort study. *Arch Dis Child Fetal Neonatal Ed*  
21    2014;**99**(6):F451-F457 doi: 10.1136/archdischild-2014-306124published  
22    Online First.
- 23  
24 17 Reddy UM, Bettgowda VR, Dias T, Yamada-Kushnir T, Ko CW, Willinger M.  
25    Term pregnancy: a period of heterogeneous risk for infant mortality.  
26    *Obstetrics and gynecology* 2011;**117**(6):1279-1287 doi:  
27    10.1097/AOG.0b013e3182179e28published Online First.
- 28  
29 18 Engle WA. Morbidity and mortality in late preterm and early term newborns: a  
30    continuum. *Clinics in perinatology* 2011;**38**(3):493-516 doi:  
31    10.1016/j.clp.2011.06.009published Online First.
- 32  
33 19 Wu CS, Sun Y, Nohr EA, Olsen J. Trends in All-Cause Mortality across  
34    Gestational Age in Days for Children Born at Term. *PloS one*  
35    2015;**10**(12):e0144754 doi: 10.1371/journal.pone.0144754published Online  
36    First.
- 37  
38 20 Yang S, Platt RW, Kramer MS. Variation in child cognitive ability by week of  
39    gestation among healthy term births. *American journal of epidemiology*  
40    2010;**171**(4):399-406 doi: 10.1093/aje/kwp413published Online First.
- 41  
42 21 Schonhaut L, Armijo I, Perez M. Gestational Age and Developmental Risk in  
43    Moderately and Late Preterm and Early Term Infants. *Pediatrics*  
44    2015;**135**(4):e835-e841 doi: 10.1542/peds.2014-1957published Online First.
- 45  
46 22 Kinney HC. The near-term (late preterm) human brain and risk for  
47    periventricular leukomalacia: a review. *Seminars in perinatology*  
48    2006;**30**(2):81-88 doi: 10.1053/j.semperi.2006.02.006published Online First.
- 49  
50 23 Hensch TK. Critical period plasticity in local cortical circuits. *Nat Rev Neurosci*  
51    2005;**6**(11):877-888 doi: 10.1038/nrn1787published Online First: 2005/11/02].
- 52  
53 24 Kapellou O, Counsell SJ, Kennea N, Dyet L, Saeed N, Stark J, et al. Abnormal  
54    cortical development after premature birth shown by altered allometric scaling  
55    of brain growth. *PLoS Med* 2006;**3**(8):e265 doi:  
56    10.1371/journal.pmed.0030265published Online First: 2006/07/27].
- 57  
58 25 Ip S, Chung M, Raman G, Chew P, Magula N, DeVine D, et al. Breastfeeding  
59  
60

- 1  
2  
3 and maternal and infant health outcomes in developed countries. *Evid Rep*  
4 *Technol Assess (Full Rep)* 2007(153):1-186 Online First: 2007/09/04].
- 5  
6 26 Quigley MA, Hockley C, Carson C, Kelly Y, Renfrew MJ, Sacker A.  
7 Breastfeeding is associated with improved child cognitive development: a  
8 population-based cohort study. *The Journal of pediatrics* 2012;**160**(1):25-32  
9 doi: 10.1016/j.jpeds.2011.06.035published Online First.
- 10  
11 27 Boucher O, Julvez J, Guxens M, Arranz E, Ibarluzea J, Sanchez de Miguel M, et  
12 al. Association between breastfeeding duration and cognitive development,  
13 autistic traits and ADHD symptoms: a multicenter study in Spain. *Pediatric*  
14 *research* 2017;**81**(3):434-442 doi: 10.1038/pr.2016.238published Online First.
- 15  
16 28 Girard LC, Doyle O, Tremblay RE. Breastfeeding, Cognitive and Noncognitive  
17 Development in Early Childhood: A Population Study. *Pediatrics* 2017;**139**(4)  
18 doi: 10.1542/peds.2016-1848published Online First.
- 19  
20 29 Koh K. Maternal breastfeeding and children's cognitive development. *Social*  
21 *science & medicine* 2017;**187**:101-108 doi:  
22 10.1016/j.socscimed.2017.06.012published Online First.
- 23  
24 30 Räisänen SH, Wu CS, Sun Y, Nohr EA, Olsen J. Trends in All-Cause Mortality  
25 across Gestational Age in Days for Children Born at Term. *PloS one*  
26 2015;**10**(12):e0144754 doi: 10.1371/journal.pone.0144754published Online  
27 First.
- 28  
29 31 Crump C, Sundquist K, Winkleby MA, Sundquist J. Early-term birth (37-38  
30 weeks) and mortality in young adulthood. *Epidemiology* 2013;**24**(2):270-276  
31 doi: 10.1097/EDE.0b013e318280da0fpublished Online First: 2013/01/23].
- 32  
33 32 Zhang X, Kramer MS. Variations in mortality and morbidity by gestational age  
34 among infants born at term. *J Pediatr* 2009;**154**(3):358-362, 362.e351 doi:  
35 10.1016/j.jpeds.2008.09.013published Online First: 2008/10/28].
- 36  
37 33 Andrade SA, Santos DN, Bastos AC, Pedromonico MR, de Almeida-Filho N,  
38 Barreto ML. [Family environment and child's cognitive development: an  
39 epidemiological approach]. *Revista de saude publica* 2005;**39**(4):606-611 doi:  
40 /S0034-89102005000400014published Online First.
- 41  
42 34 Sierau S, Dahne V, Brand T, Kurtz V, von Klitzing K, Jungmann T. Effects of  
43 Home Visitation on Maternal Competencies, Family Environment, and Child  
44 Development: a Randomized Controlled Trial. *Prevention science : the official*  
45 *journal of the Society for Prevention Research* 2016;**17**(1):40-51 doi:  
46 10.1007/s11121-015-0573-8published Online First.
- 47  
48 35 Hua J, Duan T, Gu G, Wo D, Zhu Q, Liu JQ, et al. Effects of home and  
49 education environments on children's motor performance in China.  
50 *Developmental medicine and child neurology* 2016;**58**(8):868-876 doi:  
51 10.1111/dmcn.13073published Online First.
- 52  
53  
54  
55  
56  
57  
58  
59  
60

For peer review only

**Table 1**  
Characteristics by Gestational age (n=1444)

|                                              | Total      | Early term children        |                            | Full term children             | <i>P</i> |
|----------------------------------------------|------------|----------------------------|----------------------------|--------------------------------|----------|
|                                              |            | 37wk <sup>a</sup><br>n (%) | 38wk <sup>a</sup><br>n (%) | 39-41 wk <sup>a</sup><br>n (%) |          |
| <b>Children's characteristic<sup>b</sup></b> |            |                            |                            |                                |          |
| Weight for length Z-score                    |            |                            |                            |                                |          |
| Normal                                       | 1156(80.1) | 72(82.8)                   | 162(79.0)                  | 922(80.0)                      | 0.765    |
| Over-weighted                                | 288(19.9)  | 15(17.2)                   | 43(21.0)                   | 230(20.0)                      |          |

|    |                                |           |          |           |            |           |
|----|--------------------------------|-----------|----------|-----------|------------|-----------|
| 1  |                                |           |          |           |            |           |
| 2  |                                |           |          |           |            |           |
| 3  | Gender                         |           |          |           |            |           |
| 4  | Male                           | 722(50.0) | 51(58.6) | 110(53.7) | 561(48.7)  | 0.107     |
| 5  | Female                         | 722(50.0) | 36(41.4) | 95(46.3)  | 591(51.3)  |           |
| 6  |                                |           |          |           |            |           |
| 7  | <b>Maternal characteristic</b> |           |          |           |            |           |
| 8  | Parity, n(%) <sup>b</sup>      |           |          |           |            |           |
| 9  | Nulliparous                    | 1255(8.9) | 65(74.7) | 181(88.3) | 1009(87.6) | 0.002**   |
| 10 | Multiparous                    | 189(13.1) | 22(25.3) | 24(11.7)  | 143(12.4)  |           |
| 11 | Maternal age at delivery       |           |          |           |            |           |
| 12 | ≥35                            | 49(3.4)   | 3(3.4)   | 6(2.9)    | 40(3.5)    | 0.924     |
| 13 | <35                            | 1395(9.6) | 84(96.6) | 199(97.1) | 1112(96.5) |           |
| 14 |                                |           |          |           |            |           |
| 15 | Delivery mode, n(%)            |           |          |           |            |           |
| 16 | Caesarean Section              | 632(43.7) | 43(49.4) | 101(49.3) | 664(57.6)  | 0.101     |
| 17 | Vaginal birth                  | 812(56.2) | 44(50.6) | 104(50.7) | 488(42.4)  |           |
| 18 |                                |           |          |           |            |           |
| 19 | <b>Socio-economic status</b>   |           |          |           |            |           |
| 20 | City                           |           |          |           |            |           |
| 21 | Wuxi                           | 480(33.2) | 25(28.7) | 92(44.9)  | 363(31.5)  | <0.001*** |
| 22 | Taiyuan                        | 484(33.5) | 2(2.3)   | 16(7.8)   | 466(40.5)  |           |
| 23 | Bingzhou                       | 480(33.3) | 60(69.0) | 97(47.3)  | 323(28.0)  |           |
| 24 |                                |           |          |           |            |           |
| 25 | Mother's higher education      |           |          |           |            |           |
| 26 | Yes                            | 827(57.3) | 53(60.9) | 143(69.8) | 631(54.8)  | <0.001*** |
| 27 | No                             | 617(42.7) | 34(39.1) | 62(30.2)  | 521(45.2)  |           |
| 28 |                                |           |          |           |            |           |
| 29 | Father's higher education      |           |          |           |            |           |
| 30 | Yes                            | 880(60.9) | 45(51.7) | 151(73.7) | 684(59.4)  | <0.001*** |
| 31 | No                             | 564(39.1) | 42(48.3) | 54(26.3)  | 468(40.6)  |           |
| 32 |                                |           |          |           |            |           |
| 33 | Mother's occupation            |           |          |           |            |           |
| 34 | Skilled                        | 824(57.1) | 45(51.7) | 124(60.5) | 655(56.9)  | 0.365     |
| 35 | Non-skilled                    | 620(42.9) | 42(48.3) | 81(39.5)  | 497(43.1)  |           |
| 36 |                                |           |          |           |            |           |
| 37 | Father's occupation            |           |          |           |            |           |
| 38 | Skilled                        | 869(60.2) | 46(52.9) | 129(62.9) | 694(60.2)  | 0.275     |
| 39 | Non-skilled                    | 575(39.8) | 41(47.1) | 76(37.1)  | 458(39.8)  |           |

<sup>a</sup> Gestational week

<sup>b</sup> Chi-square analysis

\* $P < 0.05$ , \*\*  $P < 0.01$ , \*\*\*  $P < 0.001$

**Table 2**  
Multivariate Linear Regression of Factors Associated With Bayley III Cognitive Development Scores

| Characteristic              | n (%)      | $\beta^a$ (95%CI)        | $\beta^b$ (95%CI)       | $\beta^c$ (95%CI)       | $\beta^d$ (95%CI)       |
|-----------------------------|------------|--------------------------|-------------------------|-------------------------|-------------------------|
| <b>All subjects(n=1444)</b> |            |                          |                         |                         |                         |
| Full term <sup>e</sup>      | 87(6.0)    | Ref                      | Ref                     | Ref                     | Ref                     |
| Born at 37 gestational week | 205(14.2)  | -1.213 (-2.718, 0.291)   | -1.102(-2.604,0.400)    | -0.950(-2.458, 0.557)   | -0.620(-2.124, 0.885)   |
| Born at 38 gestational week | 1152(79.8) | 0.968(-0.058,1.994)      | 0.997(-0.026,2.021)     | 0.963(-0.060, 1.986)    | 0.770(-0.248, 1.789)    |
| <b>Infants(n=844)</b>       |            |                          |                         |                         |                         |
| Full term <sup>e</sup>      | 46(5.5)    | Ref                      | Ref                     | Ref                     | Ref                     |
| Born at 37 gestational week | 123(14.6)  | -2.810 (-4.847,-0.774)** | -2.723(-4.765,-0.680)** | -2.545(-4.590, -0.500)* | -2.257(-4.280, -0.235)* |
| Born at 38 gestational week | 675(80.0)  | 0.450(-0.853,1.768)      | 0.532(-0.780,1.844)     | 0.548(-0.765, 1.861)    | 0.120(-1.180, 1.421)    |
| <b>Toddlers(n=600)</b>      |            |                          |                         |                         |                         |
| Full term <sup>e</sup>      | 41(6.8)    | Ref                      | Ref                     | Ref                     | Ref                     |
| Born at 37 gestational week | 82(13.7)   | 0.623(-1.618,2.863)      | 0.639(-1.567,2.874)     | 0.720(-1.528,2.969)     | 0.935(-1.356,3.225)     |
| Born at 38 gestational week | 477(79.5)  | 1.720(0.075,3.366)*      | 1.671(0.032,3.250)      | 1.449 (-0.140,3.139)    | 1.418(-0.243,3.076)     |

<sup>a</sup> Not adjusted for other variables

<sup>b</sup> Adjusted for children's characteristic (weight for length Z-score , gender ,)

<sup>c</sup> Adjusted for children's and maternal characteristic (delivery mode, parity, maternal age)

<sup>d</sup> Adjusted for children's and maternal characteristic, and socio-economic factors (city, mother's and father's education and occupation)

<sup>e</sup> Children born at 39-41 gestational weeks

\* $p < 0.05$ , \*\* $p < 0.01$

1  
2  
3  
4  
5 **Figure 1. Number of infants and toddlers who completed the questionnaire and tests**

6  
7 **Figure 2. Cognitive composite scores by gestational week in the study are expressed as means and 95% confidence**  
8 **intervals(n=1444)**  
9

10  
11  
12  
13  
14  
15  
16  
17  
18  
19  
20  
21  
22  
23  
24  
25  
26  
27  
28  
29  
30  
31  
32  
33  
34  
35  
36  
37  
38  
39  
40  
41  
42  
43  
44  
45  
46  
47

For peer review only





Figure 1. Number of infants and toddlers who completed the questionnaire and tests

279x361mm (300 x 300 DPI)

1  
2  
3  
4  
5  
6  
7  
8  
9  
10  
11  
12  
13  
14  
15  
16  
17  
18  
19  
20  
21  
22  
23  
24  
25  
26  
27  
28  
29  
30  
31  
32  
33  
34  
35  
36  
37  
38  
39  
40  
41  
42  
43  
44  
45  
46  
47  
48  
49  
50  
51  
52  
53  
54  
55  
56  
57  
58  
59  
60



Figure 2. Cognitive composite scores by gestational week in the study are expressed as means and 95% confidence intervals(n=1444)

279x361mm (300 x 300 DPI)

## STROBE Statement—checklist of items that should be included in reports of observational studies

|                              | Item No | Recommendation                                                                                                                                                                                                                                                                                                                                                                                                                                                         | On page      |
|------------------------------|---------|------------------------------------------------------------------------------------------------------------------------------------------------------------------------------------------------------------------------------------------------------------------------------------------------------------------------------------------------------------------------------------------------------------------------------------------------------------------------|--------------|
| <b>Title and abstract</b>    | 1       | (a) Indicate the study's design with a commonly used term in the title or the abstract                                                                                                                                                                                                                                                                                                                                                                                 | 1, 2         |
|                              |         | (b) Provide in the abstract an informative and balanced summary of what was done and what was found                                                                                                                                                                                                                                                                                                                                                                    | 2            |
| <b>Introduction</b>          |         |                                                                                                                                                                                                                                                                                                                                                                                                                                                                        |              |
| Background/rationale         | 2       | Explain the scientific background and rationale for the investigation being reported                                                                                                                                                                                                                                                                                                                                                                                   | 3,4          |
| Objectives                   | 3       | State specific objectives, including any prespecified hypotheses                                                                                                                                                                                                                                                                                                                                                                                                       | 5            |
| <b>Methods</b>               |         |                                                                                                                                                                                                                                                                                                                                                                                                                                                                        |              |
| Study design                 | 4       | Present key elements of study design early in the paper                                                                                                                                                                                                                                                                                                                                                                                                                | 5            |
| Setting                      | 5       | Describe the setting, locations, and relevant dates, including periods of recruitment, exposure, follow-up, and data collection                                                                                                                                                                                                                                                                                                                                        | 5,6,7        |
| Participants                 | 6       | (a) <i>Cohort study</i> —Give the eligibility criteria, and the sources and methods of selection of participants. Describe methods of follow-up<br><i>Case-control study</i> —Give the eligibility criteria, and the sources and methods of case ascertainment and control selection. Give the rationale for the choice of cases and controls<br><i>Cross-sectional study</i> —Give the eligibility criteria, and the sources and methods of selection of participants | 5            |
|                              |         | (b) <i>Cohort study</i> —For matched studies, give matching criteria and number of exposed and unexposed<br><i>Case-control study</i> —For matched studies, give matching criteria and the number of controls per case                                                                                                                                                                                                                                                 |              |
| Variables                    | 7       | Clearly define all outcomes, exposures, predictors, potential confounders, and effect modifiers. Give diagnostic criteria, if applicable                                                                                                                                                                                                                                                                                                                               | 4,5,6        |
| Data sources/<br>measurement | 8*      | For each variable of interest, give sources of data and details of methods of assessment (measurement). Describe comparability of assessment methods if there is more than one group                                                                                                                                                                                                                                                                                   |              |
| Bias                         | 9       | Describe any efforts to address potential sources of bias                                                                                                                                                                                                                                                                                                                                                                                                              | 5,7,8        |
| Study size                   | 10      | Explain how the study size was arrived at                                                                                                                                                                                                                                                                                                                                                                                                                              | 5            |
| Quantitative variables       | 11      | Explain how quantitative variables were handled in the analyses. If applicable, describe which groupings were chosen and why                                                                                                                                                                                                                                                                                                                                           | 6,7          |
| Statistical methods          | 12      | (a) Describe all statistical methods, including those used to control for confounding                                                                                                                                                                                                                                                                                                                                                                                  | 7,8          |
|                              |         | (b) Describe any methods used to examine subgroups and interactions                                                                                                                                                                                                                                                                                                                                                                                                    | 7,8          |
|                              |         | (c) Explain how missing data were addressed                                                                                                                                                                                                                                                                                                                                                                                                                            | 5, Figure 1. |
|                              |         | (d) <i>Cohort study</i> —If applicable, explain how loss to follow-up was addressed<br><i>Case-control study</i> —If applicable, explain how matching of cases and controls was addressed<br><i>Cross-sectional study</i> —If applicable, describe analytical methods taking account of sampling strategy                                                                                                                                                              | 7,8          |
|                              |         | (e) Describe any sensitivity analyses                                                                                                                                                                                                                                                                                                                                                                                                                                  |              |

Continued on next page

| <b>Results</b>           |     |                                                                                                                                                                                                                                                                                                                                                                                                               | <b>On page</b>                         |
|--------------------------|-----|---------------------------------------------------------------------------------------------------------------------------------------------------------------------------------------------------------------------------------------------------------------------------------------------------------------------------------------------------------------------------------------------------------------|----------------------------------------|
| Participants             | 13* | (a) Report numbers of individuals at each stage of study—eg numbers potentially eligible, examined for eligibility, confirmed eligible, included in the study, completing follow-up, and analysed<br>(b) Give reasons for non-participation at each stage<br>(c) Consider use of a flow diagram                                                                                                               | 8<br><br>Figure 1                      |
| Descriptive data         | 14* | (a) Give characteristics of study participants (eg demographic, clinical, social) and information on exposures and potential confounders<br>(b) Indicate number of participants with missing data for each variable of interest<br>(c) <i>Cohort study</i> —Summarise follow-up time (eg, average and total amount)                                                                                           | 8<br><br>5, Figure 1.                  |
| Outcome data             | 15* | <i>Cohort study</i> —Report numbers of outcome events or summary measures over time<br><i>Case-control study</i> —Report numbers in each exposure category, or summary measures of exposure<br><i>Cross-sectional study</i> —Report numbers of outcome events or summary measures                                                                                                                             | <br><br>Table I~IV                     |
| Main results             | 16  | (a) Give unadjusted estimates and, if applicable, confounder-adjusted estimates and their precision (eg, 95% confidence interval). Make clear which confounders were adjusted for and why they were included<br>(b) Report category boundaries when continuous variables were categorized<br>(c) If relevant, consider translating estimates of relative risk into absolute risk for a meaningful time period | 9,10<br><br>9,10<br><br>Not applicable |
| Other analyses           | 17  | Report other analyses done—eg analyses of subgroups and interactions, and sensitivity analyses                                                                                                                                                                                                                                                                                                                | 9,10                                   |
| <b>Discussion</b>        |     |                                                                                                                                                                                                                                                                                                                                                                                                               |                                        |
| Key results              | 18  | Summarise key results with reference to study objectives                                                                                                                                                                                                                                                                                                                                                      | 10                                     |
| Limitations              | 19  | Discuss limitations of the study, taking into account sources of potential bias or imprecision. Discuss both direction and magnitude of any potential bias                                                                                                                                                                                                                                                    | 14                                     |
| Interpretation           | 20  | Give a cautious overall interpretation of results considering objectives, limitations, multiplicity of analyses, results from similar studies, and other relevant evidence                                                                                                                                                                                                                                    | 11,12                                  |
| Generalisability         | 21  | Discuss the generalisability (external validity) of the study results                                                                                                                                                                                                                                                                                                                                         | 10,11,12,13                            |
| <b>Other information</b> |     |                                                                                                                                                                                                                                                                                                                                                                                                               |                                        |
| Funding                  | 22  | Give the source of funding and the role of the funders for the present study and, if applicable, for the original study on which the present article is based                                                                                                                                                                                                                                                 | 14                                     |

\*Give information separately for cases and controls in case-control studies and, if applicable, for exposed and unexposed groups in cohort and cross-sectional studies.

**Note:** An Explanation and Elaboration article discusses each checklist item and gives methodological background and published examples of transparent reporting. The STROBE checklist is best used in conjunction with this article (freely available on the Web sites of PLoS Medicine at <http://www.plosmedicine.org/>, Annals of Internal Medicine at <http://www.annals.org/>, and Epidemiology at <http://www.epidem.com/>). Information on the STROBE Initiative is available at [www.strobe-statement.org](http://www.strobe-statement.org).
